# Supplementary material for: Integrative omics analysis of plant-microbe synergies in petroleum pollution remediation
Source: PeerJ. 2025 Jun 20;13:e19396. doi: 10.7717/peerj.19396 (PMC12184672; doi:10.7717/peerj.19396)
Supplement: Supplemental Information 2 — The first row (from B1 to G1) indicates Concentration, Volume, Yield, RIN (RNA Integrity Number), 28S/18S, and Quality Class of RNA, respectively. The first column (from A2 to A12) indicates 4 group samples (each contains 3 independent biological repeats, resulting in a total of 12 samples) in this study. [file peerj-13-19396-s002.xlsx]

## Sheet: Sheet1
Sample	Concentration (ng/mL)	Volume (mL)	Yield (mg)	RIN	28S/18S	Quality Class
0h-1	785	20	15700	8.2	1.4	A
0h-2	792	20	15840	7.3	1.2	A
0h-3	854	20	17080	7.6	1.4	A
6h-1	982	20	19640	8.5	1.5	A
6h-2	923	20	18460	8.3	1.4	A
6h-3	965	20	19300	7.5	1.3	A
12h-1	856	20	17120	8	1.3	A
12h-2	869	20	17380	8.8	1.4	A
12h-3	878	20	17560	7.6	1.3	A
24h-1	963	20	19260	8.7	1.4	A
24h-2	991	20	19820	9.1	1.4	A
24h-3	943	20	18860	8.8	1.4	A
