# Supplementary material for: Integrative omics analysis of plant-microbe synergies in petroleum pollution remediation
Source: PeerJ. 2025 Jun 20;13:e19396. doi: 10.7717/peerj.19396 (PMC12184672; doi:10.7717/peerj.19396)
Supplement: Supplemental Information 3 — The first column (from A2 to A9) indicates Gene ID of 10 selected genes (including the reference gene) for qPCR validation. The first row (from B1 to G1) indicates Gene Name, Forward primer, Reverse Primer, , Tm, Product Size, Primer Blast result in NCBI, respectively [file peerj-13-19396-s003.xlsx]

## Sheet: Sheet1
GeneID	Gene Name	Forward primer	Reverse Primer	Tm	Product Size	Primer Blast
MsG0680034725.01	protein REDOX2-Like	TTGGCAGCAAGGGAAACTGA	TCCAAGAGCTGACCAAGCAC	60	80bp-150bp	specificity
MsG0580024680.01	NAC family transcription factor	TGCAATGTCCCTCCTATGGC	AGGGGAGATCCAGAAGGTTGA	62	80bp-150bp	specificity
MsG0880044306.01	gibberellin 2-beta-dioxygenase 1	TGCACCTTTGCCTTGTCTCA	TCTCTCAAAGTGACAAAGCCT	61	80bp-150bp	specificity
MsG0380015231.01	glutathione S-transferase,amino-terminal	ACACAAGGCATAGCATAGCATA	GTCCACCAAAACATAGTGGGG	58	80bp-150bp	specificity
MsG0780039504.01	cytochrome P450 76T24	GAGCCGCAATGAAATGGTGC	ATAGCTCTGCCATGACCCAC	59	80bp-150bp	specificity
MsG0480021753.01	L-ascorbate oxidase homolog	GCACAAGTGAATGGCAAGCA	CTTCAGAGGAGTGTCGGCTG	61	80bp-150bp	specificity
MsG0380016748.01	peroxidase P7	AGAAACTCTGCTCGTGGATTTG	CAGCACATGATACAACGCCAG	60	80bp-150bp	specificity
MsG0280008006.01	flowering-promoting factor 1-like proten 1	CAATCACGGCATCAGCGAGGAG	CTTGCGTAGCCAACACTCTCACC	58	80bp-150bp	specificity
MsG0580028960.01	transcription factor MYB1	AGGTGTTGGTTCATACCGCA	TGAGCGTTTGTGGAACTGGA	57	80bp-150bp	specificity
MsG0180000525.01	transcription factor WRKY7	GACCAACATGTGTGAGAACTATGA	ACTTTCACTCTCAGCTTTTCTCTTT	59	80bp-150bp	specificity
GAPDH		TCATTCCGTGTCCCAACCG	CCACATCATCTTCAGTGTAACCCA	60	80bp-150bp	specificity
