# Supplementary material for: Integrative omics analysis of plant-microbe synergies in petroleum pollution remediation
Source: PeerJ. 2025 Jun 20;13:e19396. doi: 10.7717/peerj.19396 (PMC12184672; doi:10.7717/peerj.19396)
Supplement: Supplemental Information 4 — A2-A126 were collected samples A2-A126 were collected at different time points. The Cq values for the target gene and GAPDH are listed in columns B and C, respectively. Column D represents △Cq, column E represents the average, column F represents △△Cq, and column G represents 2-△△Cq. [file peerj-13-19396-s004.xlsx]

## Sheet: Sheet1
	REDOX2	ACTIN	△CT	average	△△CT	2-△△CT
0	29.9	18.21	11.69	11.4367	0.253333	0.838956
	29.47	18.15	11.32		-0.116667	1.08423
	29.37	18.07	11.3		-0.136667	1.09936
6	25.98	18.54	7.44		-3.99667	15.9631
	25.84	18.48	7.36		-4.07667	16.8733
	25.72	18.29	7.43		-4.00667	16.0741
12	24.97	18.31	6.66		-4.77667	27.4107
	24.95	18.11	6.84		-4.59667	24.1955
	24.94	17.95	6.99		-4.44667	21.8062
24	24.42	18.24	6.18		-5.25667	38.2309
	24.38	18.12	6.26		-5.17667	36.1686
	24.14	18.06	6.08		-5.35667	40.9748
	p450	ACTIN	△CT	average	△△CT	2-△△CT
0	25.85	18.87	6.98	7.00333	-0.0233333	1.0163
	25.8	18.82	6.98		-0.0233333	1.0163
	25.79	18.74	7.05		0.0466667	0.968171
6	23.72	18.74	4.98		-2.02333	4.06522
	23.67	18.68	4.99		-2.01333	4.03714
	23.42	18.49	4.93		-2.07333	4.20858
12	22.43	18.36	4.07		-2.93333	7.63873
	22.31	18.24	4.07		-2.93333	7.63873
	22.19	17.99	4.2		-2.80333	6.98051
24	20.31	18.12	2.19		-4.81333	28.1163
	20.29	18.07	2.22		-4.78333	27.5376
	20.13	18.04	2.09		-4.91333	30.1343
	MYB1	ACTIN	△CT	average	△△CT	2-△△CT
0	25.63	18.24	7.39	7.26333	0.126667	0.915945
	25.54	18.18	7.36		0.0966667	0.935191
	25.19	18.15	7.04		-0.223333	1.16743
6	19.95	18.51	1.44		-5.82333	56.6237
	19.86	18.49	1.37		-5.89333	59.4388
	19.64	18.42	1.22		-6.04333	65.9515
12	17.56	18.65	-1.09		-8.35333	327.042
	17.54	18.61	-1.07		-8.33333	322.54
	17.47	18.59	-1.12		-8.38333	333.914
24	18.09	18.43	-0.34		-7.60333	194.461
	18.04	18.41	-0.37		-7.63333	198.547
	18.02	18.37	-0.35		-7.61333	195.813
	glutathione S-transferase	ACTIN	△CT	average	△△CT	2-△△CT
0	25.85	18.82	7.03	6.99667	0.0333333	0.97716
	25.65	18.75	6.9		-0.0966667	1.0693
	25.58	18.52	7.06		0.0633333	0.95705
6	23.72	18.51	5.21		-1.78667	3.45017
	23.67	18.72	4.95		-2.04667	4.1315
	23.42	18.53	4.89		-2.10667	4.30695
12	21.43	18.68	2.75		-4.24667	18.9834
	21.31	18.54	2.77		-4.22667	18.7221
	21.19	18.49	2.7		-4.29667	19.6529
24	19.24	18.54	0.7		-6.29667	78.6114
	19.12	18.48	0.64		-6.35667	81.9497
	18.97	18.42	0.55		-6.44667	87.2248
	NAC3	ACTIN
0	21.4	19.15	2.25	2.55	-0.3	1.23114
	21.6	18.3	3.3		0.75	0.594604
	21	18.9	2.1		-0.45	1.36604
6	18.8	21.55	-2.75		-5.3	39.3966
	18.4	21.74	-3.34		-5.89	59.3016
	18.1	21.62	-3.52		-6.07	67.1819
12	18.8	25.8	-7		-9.55	749.612
	18.9	25.86	-6.96		-9.51	729.114
	18.5	25.83	-7.33		-9.88	942.272
24	19.11	24.2	-5.09		-7.64	199.466
	18.34	24.5	-6.16		-8.71	418.766
	18.35	24.32	-5.97		-8.52	367.093
	L-ascorbate oxidase homolog	ACTIN
0	21.88	19.37	2.51	2.40667	0.103333	0.93088
	22.03	19.77	2.26		-0.146667	1.10701
	22.16	19.71	2.45		0.0433333	0.97041
6	19.01	18.85	0.16		-2.24667	4.74585
	19.07	18.3	0.77		-1.63667	3.10947
	19.11	18.02	1.09		-1.31667	2.4909
12	18.91	19.22	-0.31		-2.71667	6.57352
	19.17	19.95	-0.78		-3.18667	9.10505
	18.76	19.86	-1.1		-3.50667	11.3661
24	17.41	18.42	-1.01		-3.41667	10.6787
	17.27	18.46	-1.19		-3.59667	12.0977
	17.81	18.5	-0.69		-3.09667	8.5544
	FT	ACTIN
0	20.2	19.15	1.05	1.325	-0.275	1.20999
	19.9	18.3	1.6		0.275	0.82645
	19.2	18	1.2		-0.125	1.09051
6	20.01	18.74	1.27		-0.055	1.03886
	20.08	18.62	1.46		0.135	0.91067
	20.19	18.8	1.39		0.065	0.955945
12	22.11	19.76	2.35		1.025	0.49141
	22.01	19.86	2.15		0.825	0.564482
	22.03	19.83	2.2		0.875	0.545254
24	21.26	18.4	2.86		1.535	0.345079
	21.23	18.36	2.87		1.545	0.342696
	21.98	18.32	3.66		2.335	0.198196
	GA20ox1	ACTIN
0	19.47	18.77	0.7	1.85333	-1.15333	2.22427
	20.98	18.71	2.27		0.416667	0.749154
	20.99	18.4	2.59		0.736667	0.600124
6	17.98	19.1	-1.12		-2.97333	7.85349
	17.86	19.02	-1.16		-3.01333	8.07428
	17.59	19.21	-1.62		-3.47333	11.1065
12	17.65	18.22	-0.57		-2.42333	5.36409
	17.85	18.95	-1.1		-2.95333	7.74537
	17.75	18.86	-1.11		-2.96333	7.79924
24	17.93	19.82	-1.89		-3.74333	13.3923
	17.88	19.66	-1.78		-3.63333	12.4092
	17.82	19.5	-1.68		-3.53333	11.5782
	WRKY7	ACTIN
0	27.59	18.34	9.25	9.21	#REF!	#REF!
	27.51	18.29	9.22		#REF!	#REF!
	27.43	18.27	9.16		#REF!	#REF!
6	21.81	18.31	3.5		#REF!	#REF!
	21.69	18.27	3.42		#REF!	#REF!
	21.61	18.25	3.36		#REF!	#REF!
12	17.67	18.12	-0.45		#REF!	#REF!
	17.64	18.08	-0.44		#REF!	#REF!
	17.59	18.07	-0.48		#REF!	#REF!
24	19.17	18.32	0.85		#REF!	#REF!
	19.15	18.27	0.88		#REF!	#REF!
	19.05	18.18	0.87		#REF!	#REF!
