# Supplementary material for: Integrative omics analysis of plant-microbe synergies in petroleum pollution remediation
Source: PeerJ. 2025 Jun 20;13:e19396. doi: 10.7717/peerj.19396 (PMC12184672; doi:10.7717/peerj.19396)
Supplement: Supplemental Information 5 — The column A represents different times of samples, and columns B to M represent the TPH degradation Rate. [file peerj-13-19396-s005.xlsx]

## Sheet: Sheet1
days	CK(%)	CK(%)	CK(%)	T1(%)	T1(%)	T1(%)	T2(%)	T2(%)	T2(%)	T3(%)	T3(%)	T3(%)
0	0	0	0	0	0	0	0	0	0	0	0	0
10	7	7.1	6.8	10	10.1	10.3	11	11.23	10.99	12.2	12.43	12.01
20	15.12	15.22	14.98	19.52	19.42	19.31	21.21	21.12	21.33	23.23	23.12	23.03
30	20.1	20.14	20.01	26.33	25.99	26.15	27.16	27	27.11	33.16	33.2	33.15
40	25	25.14	25.01	32.02	32.12	32.42	35.16	35.2	35.21	45.54	45.24	45.11
50	30.21	30.16	30.22	38.13	38.21	38.23	40.25	40.35	40.32	52.87	52.65	52.77
60	35.41	35.21	35.44	42.35	42.56	42.78	45.65	45.46	45	58.56	58.54	58.34
70	38.54	38.26	38.52	46.56	46.54	46.36	50.43	50.32	50.22	62.65	62.55	62.5
80	40	40.12	40.1	48.53	48.69	48.7	53.23	53.21	53.11	66.54	66.44	66.32
