# Supplementary material for: Integrative omics analysis of plant-microbe synergies in petroleum pollution remediation
Source: PeerJ. 2025 Jun 20;13:e19396. doi: 10.7717/peerj.19396 (PMC12184672; doi:10.7717/peerj.19396)
Supplement: Supplemental Information 8 [file peerj-13-19396-s008.xlsx]

## Sheet: pos
Metabolite	m/z	Retention time (min)	Isotope Similarity	Theoretical Isotope Distribution
2,5-Furandicarboxaldehyde	157.05	0.12205	93.3407	100 - 6.65 - 0.802
4-hydroxy Nonenal Alkyne	153.091	0.32965	98.1675	100 - 9.95 - 0.853
2-Furanmethanol	99.0445	0.337667	99.4019	100 - 5.55 - 0.536
Ornithine	133.097	0.433317	93.5148	100 - 6.35 - 0.582
TROMETHAMINE	122.081	0.513183	94.6553	100 - 4.93 - 0.714
Choline	104.107	0.521183	98.4009	100 - 5.97 - 0.354
L-Histidine	156.077	0.529183	95.0304	100 - 7.77 - 0.675
L-Serine	106.05	0.529183	97.1749	100 - 3.8 - 0.671
L-Carnitine	162.113	0.537183	94.033	100 - 8.22 - 0.913
L-Threonine	120.066	0.537183	96.2203	100 - 4.91 - 0.713
Morpholine	88.0762	0.537183	97.3453	100 - 4.83 - 0.298
N-Methyl-D-Aspartic Acid	148.06	0.537183	94.845	100 - 6.03 - 0.974
L-Valine	118.087	0.545167	98.7885	100 - 5.98 - 0.56
Methionine Sulfoxide	166.053	0.545167	94.4968	100 - 6.81 - 5.33 - 0.317
L-Prolinamide	115.087	0.545167	97.0748	100 - 6.29 - 0.373
Creatine	132.077	0.569183	96.0196	100 - 5.6 - 0.542
3-Amino-1-hydroxypyrrolidin-2-one	161.03	0.577183	98.6877	100 - 5.23 - 0.523
L-Proline	116.071	0.585167	97.8512	100 - 5.95 - 0.558
2-Aminoethane-1,1,1-triol	76.0398	0.593167	94.9035	100 - 2.72 - 0.641
Sucrose	365.105	0.593167	93.4451	100 - 13.7 - 3.12 - 0.341
2-Methoxy-5-Methyl-3-(2-Methylbut-3-En-2-Yl)Chromen-4-One	322.143	0.60175	87.5809	100 - 17.6 - 2.08 - 0.184
Pymetrozine	182.081	0.60175	97.0751	100 - 12.8 - 0.964
L-2-Aminobutyric acid	104.071	0.60175	91.3013	100 - 4.87 - 0.506
D-Pantothenoyl-L-cysteine	323.127	0.6097	94.1937	100 - 15 - 6.8 - 0.871 - 0.14
TETRAHYDROURIDINE	231.097	0.6097	88.6544	100 - 10.9 - 1.77 - 0.15
Eremopetasidione	259.129	0.6097	96.7557	100 - 15.5 - 1.73 - 0.145
Pantothenic acid	220.118	0.6097	93.3237	100 - 10.5 - 1.52 - 0.121
4-Acetamido-2-aminobutanoic acid	125.071	0.6097	96.9915	100 - 7.47 - 0.859
Pyrimidin-4-yl-Methanol	111.056	0.6097	77.9074	100 - 6.25 - 0.37
Triisopropanolamine	192.159	0.6097	94.7982	100 - 10.5 - 1.11
Formiminoglutamic acid	139.05	0.617667	98.0446	100 - 7.49 - 1.07
Dimethyl Sulfoxide	79.0217	0.641583	92.758	100 - 3.07 - 4.76 - 0.109
3-Aminopropionaldehyde	74.0606	0.6734	96.3736	100 - 3.73 - 0.257
4-Hydroxybenzoylcholine	224.128	0.87425	93.2054	100 - 13.7 - 1.48 - 0.117
Formyl 3-hydroxybutanoate	115.039	0.87425	97.1417	100 - 5.65 - 0.952
Adenine	136.062	0.890217	93.058	100 - 7.29 - 0.233
Nonate	153.091	0.890217	97.7841	100 - 10.1 - 1.28
Uracil	113.035	0.906217	96.0661	100 - 5.18 - 0.52
Maltol	127.039	0.906217	96.0052	100 - 6.67 - 0.804
Guanine	152.057	0.906217	92.9059	100 - 7.33 - 0.442
Isocolumbin	323.127	0.9142	91.4787	100 - 22.1 - 3.56 - 0.427
Isonicotinic acid	124.04	0.946217	98.1046	100 - 6.99 - 0.619
Urocanic Acid	139.05	0.994117	98.3744	100 - 7.37 - 0.646
Niacinamide	123.055	1.02605	97.3261	100 - 7.33 - 0.437
Hypoxanthine	137.046	1.034	93.4827	100 - 6.95 - 0.415
Pyroglutamic Acid	130.05	1.17755	98.2776	100 - 5.97 - 0.765
(S)-2-Aceto-2-hydroxybutanoic acid	188.092	1.2254	97.4494	100 - 6.76 - 1.02
4-Imidazolone-5-propionic acid	121.04	1.2254	92.6409	100 - 7.43 - 0.856
4-Hydroxy-3-methyl-2-(2-propynyl)-2-cyclopentene-1-one	323.127	1.46447	97.4411	100 - 9.93 - 0.851
2-Hydroxycinnamic acid	182.081	1.48045	97.3764	100 - 9.94 - 1.06
5'-Methylthioadenosine	339.122	1.50443	89.5231	100 - 14.8 - 6.16 - 0.768
Norleucine	132.102	1.56027	98.7105	100 - 7.08 - 0.626
2-Hydroxyphenylacetic Acid	135.044	1.57617	92.3876	100 - 8.86 - 0.962
MDMA	194.118	1.58413	87.9972	100 - 12.5 - 1.13
Daunosamine	130.086	1.616	95.8985	100 - 7.12 - 0.834
Deoxyadenosine	252.109	1.65585	88.182	100 - 12.9 - 1.39 - 0.108
Levetiracetam	203.139	1.67978	92.5108	100 - 9.62 - 0.826
Heptanoate	297.144	1.67978	98.3635	100 - 7.8 - 0.674
Halleridone	172.097	1.67978	97.8263	100 - 8.88 - 0.964
3-[[(2S)-2,4-Dihydroxy-3,3-dimethylbutanoyl]amino]propanoic acid	202.107	1.67978	90.1036	100 - 10.5 - 1.52 - 0.121
8-(2-Hydroxyethyl)theophyline	247.079	1.8473	89.5786	100 - 11.4 - 1.22
Homo-L-arginine	233.099	1.8473	96.5754	100 - 9.29 - 0.799
Indole-3-Carboxylic Acid	162.055	1.85517	93.8772	100 - 10.3 - 0.884
Ecgonine	186.112	1.86313	91.485	100 - 10.4 - 1.1
Sitostanol-beta	321.071	1.86313	88.3523	100 - 14.1 - 2.37 - 0.24
MJDBISSP00000009	171.118	1.87112	90.2572	100 - 10.2 - 0.882
Ethyl glucuronide	245.063	1.9188	93.7113	100 - 9.08 - 1.8 - 0.139
3,4-Dihydroxyhydrocinnamic acid	200.092	1.9188	97.1901	100 - 10 - 1.27
Osmundalin	291.105	1.9745	86.4021	100 - 13.5 - 2.48 - 0.253
Panthenol	206.139	2.03033	96.3936	100 - 10.5 - 1.32
Valine-betaxanthin	311.123	2.05415	92.0647	100 - 16.3 - 2.48 - 0.26
4-O-(Indole-3-acetyl)-D-glucopyranose	379.149	2.07017	97.1969	100 - 18.2 - 2.99 - 0.344
Pentaethylene glycol	239.149	2.14983	98.5453	100 - 11.3 - 1.81 - 0.157
L-Dopa	198.076	2.17363	90.3882	100 - 10.4 - 1.31
Forodesine	289.089	2.17363	94.6105	100 - 13.7 - 1.69 - 0.146
Indoleacrylic acid	188.071	2.3007	94.9486	100 - 12.4 - 1.12
2-Benzimidazolecarbamic acid	355.113	2.3485	96.1735	100 - 9.91 - 0.853
Cyclopropyl-[(3S,4S)-3-(dimethylamino)-4-(hydroxymethyl)piperidin-1-yl]methanone	227.175	2.3485	96.0394	100 - 14 - 1.32
Carbendazim	192.077	2.3565	89.3078	100 - 11 - 0.962
Kainic acid	214.107	2.3565	91.8928	100 - 11.5 - 1.42 - 0.113
Benzeneacetonitrile	117.058	2.36448	91.3535	100 - 9.1 - 0.366
MJDBISSP00000001	200.047	2.36448	74.5324	100 - 10.3 - 32.8 - 3.34 - 0.286
Voxelotor	697.271	2.41183	90.7695	100 - 22 - 2.92 - 0.288
Beta-D-galactosyl	374.202	2.43532	93.7637	100 - 7.92 - 1.3
Coniferyl ferulate	713.266	2.56252	92.6774	100 - 22.1 - 3.56 - 0.427
4-Ipomeanol	210.112	2.56252	90.4195	100 - 9.99 - 1.06
Cellobioside	372.186	2.63427	96.5452	100 - 15.8 - 3.22 - 0.378
Alpha-D-Gal-(1->3)-beta-D-Gal-(1->4)-D-GlcNAc	546.208	2.6421	92.2652	100 - 23 - 5.82 - 0.932 - 0.142
Gomisin D	530.213	2.72148	88.7114	100 - 31.1 - 6.71 - 1.09 - 0.146
2-(3-fluorophenyl)-4-(4-Methylpiperazin-1-yl)-1H-pyrrolo[3,2-c]pyridine	328.196	2.84868	90.2839	100 - 21.1 - 2.13 - 0.136
Vanillic acid	169.049	2.87257	91.3083	100 - 8.9 - 1.17
H-Arg(NO2)-Obzl	342.175	2.88055	94.3845	100 - 16.3 - 2.06 - 0.193
N(6)-Monobutyryladenosine	697.27	2.88838	92.3043	100 - 17.4 - 2.45 - 0.251
Arctiopicrin	395.144	2.90422	87.9795	100 - 21.1 - 3.34 - 0.393
Amastatin	492.301	2.9281	91.4916	100 - 24.9 - 4.62 - 0.636
Aminosalicylic Acid	307.092	2.96805	95.3539	100 - 8.13 - 0.905
(2S)-2-Butanol O-[b-D-Apiofuranosyl-(1->6)-b-D-glucopyranoside]	391.157	3.0873	85.7423	100 - 16.9 - 3.4 - 0.414
Neamine	386.201	3.0873	97.2629	100 - 15 - 2.28 - 0.23
5'-O-beta-D-Glucosylpyridoxine	395.144	3.19075	92.2699	100 - 16.1 - 2.85 - 0.32
Sanfetrinem	345.144	3.23047	97.0871	100 - 15.9 - 2.21 - 0.218
Leu-Leu-Tyr	430.228	3.27037	90.4149	100 - 24.4 - 3.87 - 0.462
Dimethylethanolamine	90.0918	3.28628	95.0972	100 - 4.86 - 0.299
Astromicin	370.243	3.32597	80.2994	100 - 20.8 - 3.3 - 0.387
(+)-Abscisic Acid	265.143	3.34193	88.3552	100 - 16.6 - 2.11 - 0.199
Umbelliferone	163.039	3.39748	95.1285	100 - 9.92 - 1.06
Gentamicin C2	446.295	3.41327	84.1189	100 - 24.2 - 4.25 - 0.555
Dibekacin	474.254	3.43705	94.0425	100 - 22 - 3.96 - 0.516
Cyclo(Arg-Gly-Asp-D-Phe-Val)	592.317	3.45298	93.3796	100 - 31.7 - 6.32 - 0.941 - 0.114
Paroxetine	681.276	3.49277	91.8673	100 - 21.3 - 2.76 - 0.268
Gentamicin C	414.269	3.50867	78.3742	100 - 23.1 - 3.99 - 0.511
Epinephrine	184.097	3.5406	92.1237	100 - 10.4 - 1.1
3-Methyl-1-propylxanthine	231.084	3.54858	93.252	100 - 11.4 - 1.01
1,2,10-Trihydroxydihydro-trans-linalyl oxide 7-O-beta-D-glucopyranoside	400.217	3.59632	85.9726	100 - 18 - 3.59 - 0.451
Digitoxigenin bisdigitoxide	652.411	3.62015	89.0419	100 - 38.9 - 9.4 - 1.7 - 0.25
20-Hydroxy-leukotriene E4	488.269	3.63613	86.2006	100 - 26.7 - 9.18 - 1.78 - 0.287
L-Valine, N-(2-hydroxy-3-butenyl)-	210.11	3.65212	91.0961	100 - 10.4 - 1.1
Proscillaridin	548.327	3.68383	87.9856	100 - 33.2 - 6.99 - 1.1 - 0.141
2-Amino-3-cyclohexylpropanoic acid	172.133	3.7635	92.9386	100 - 10.4 - 0.895
Cucurbitacin A	592.353	3.81117	87.8457	100 - 35.5 - 7.96 - 1.33 - 0.183
Erythromycylamine	379.248	3.827	91.9994	100 - 42 - 11.1 - 2.18 - 0.351
Cilengitide	606.333	3.85088	85.4872	100 - 32.9 - 6.67 - 1.01 - 0.124
Dihydrodigitoxin	784.489	3.91468	83.2127	100 - 45.6 - 12.8 - 2.69 - 0.46
Digoxin	798.468	3.94657	84.9448	100 - 45.6 - 13 - 2.79 - 0.487
Erythromycin 2'-acetate	399.738	3.9544	94.8118	100 - 43.9 - 12.3 - 2.57 - 0.442
SM(d18:1/PGF2alpha)	423.274	4.00232	90.9186	100 - 48.5 - 13.4 - 2.68 - 0.43
26-Glucosyl-1,3,11,22-tetrahydroxyergosta-5,24-dien-26-oate	680.405	4.01825	87.4065	100 - 37.8 - 9.21 - 1.68 - 0.252
Roxithromycin	430.264	4.03418	92.4815	100 - 46.5 - 13.7 - 3 - 0.54
Metocurine	694.385	4.06603	76.0441	100 - 44.8 - 11 - 1.94 - 0.272
PE(20:5(7Z,9Z,11E,13E,17Z)-3OH(5,6,15)/20:4(8Z,11Z,14Z,17Z))	428.74	4.07403	81.3047	100 - 50.3 - 14.6 - 3.12 - 0.537
Avermectin	437.254	4.07403	85.3881	100 - 53.3 - 16.8 - 3.9 - 0.735 - 0.118
PA(20:5(5Z,8Z,11Z,14Z,17Z)/PGF1alpha)	420.227	4.07403	78.4966	100 - 47.7 - 13.4 - 2.77 - 0.464
PE(20:4(8Z,11Z,14Z,17Z)-2OH(5S,6R)/DiMe(13,5))	458.787	4.14587	78.3864	100 - 54.7 - 17 - 3.82 - 0.688 - 0.105
PE(20:5(7Z,9Z,11E,13E,17Z)-3OH(5,6,15)/DiMe(13,5))	465.777	4.1778	93.2147	100 - 54.8 - 17.2 - 3.93 - 0.723 - 0.112
Didemnin A	472.288	4.20972	75.7638	100 - 56.5 - 18.2 - 4.24 - 0.795 - 0.126
N-di-Demethyl roxithromycin	415.259	4.26572	87.4118	100 - 45.4 - 12.9 - 2.76 - 0.481
Zotarolimus	494.78	4.27373	82.9301	100 - 59.4 - 19.8 - 4.78 - 0.923 - 0.15
N-[2-(3,5-Dioxopiperazino)propyl]-N-(2-amino-2-oxoethyl)glycine	328.16	4.37723	86.3273	100 - 13.8 - 1.91 - 0.176
Permetin A	562.342	4.39323	89.4174	100 - 64.3 - 22.8 - 5.81 - 1.18 - 0.2
Polymyxin B2	606.369	4.48108	90.3894	100 - 66.9 - 24.7 - 6.56 - 1.39 - 0.246
Parsalmide	534.312	4.5131	88.8821	100 - 16.2 - 1.63 - 0.124
Postin	560.326	4.66513	92.7981	100 - 27.4 - 4.64 - 0.587
Isomaltoside	377.142	4.68913	86.1869	100 - 15.8 - 3.22 - 0.378
2-(L-Menthoxy)ethanol	218.211	4.75295	97.429	100 - 13.3 - 1.23
Digoxigenin bisdigitoxoside	692.405	4.8572	79.3392	100 - 38.9 - 9.62 - 1.78 - 0.27
Histidylcysteine	259.088	4.88112	93.1977	100 - 12.3 - 5.83 - 0.618
(S)-10,16-Dihydroxyhexadecanoic acid	306.263	4.89712	94.9988	100 - 17.8 - 2.32 - 0.225
Arphamenine B	359.167	4.9209	85.92	100 - 19.2 - 2.57 - 0.258
Floionolic acid	350.29	4.94462	85.5595	100 - 20.1 - 2.94 - 0.32
Foliandrin	618.369	5.06395	92.7785	100 - 35.5 - 7.97 - 1.34 - 0.183
Neuraminic acid	331.109	5.08782	95.5088	100 - 10.6 - 2.15 - 0.188
Hydroxyfluoroprednisolone butyrate	447.219	5.08782	77.3232	100 - 27.7 - 5.12 - 0.712
5b-Cyprinol sulfate	574.343	5.26247	86.0122	100 - 30.9 - 10.8 - 2.31 - 0.41
Moxifloxacin	465.193	5.28645	82.4375	100 - 24.2 - 3.63 - 0.407
N-Phenylacetylaspartic acid	234.076	5.36575	87.744	100 - 13.7 - 1.89 - 0.174
Medicagenic acid 3-O-beta-D-glucoside	706.42	5.37338	77.886	100 - 40 - 10 - 1.89 - 0.29
P-Toluenesulfonamide	136.022	5.38918	87.2518	100 - 8.92 - 5.28 - 0.411
Loganate	358.125	5.46858	88.6841	100 - 18 - 3.57 - 0.448
Beta-Zearalenol	321.168	5.48433	83.54	100 - 19.9 - 2.91 - 0.316
Ascorbyl stearate	475.325	5.49232	82.7343	100 - 26.7 - 4.86 - 0.665
Humulene	249.157	5.49232	88.0095	100 - 16.5 - 1.27
10-Deacetylbaccatin III	509.22	5.49232	91.9397	100 - 32.2 - 7.06 - 1.16 - 0.158
2-Amino-4-oxo-6-(1',2',3'-trihydroxypropyl)-diquinoid-7,8-dihydroxypterin	353.12	5.50032	91.0831	100 - 12 - 1.89 - 0.169
N-Carboxyacetyl-D-phenylalanine	216.065	5.50032	88.1707	100 - 13.7 - 1.89 - 0.174
Cholylcitrulline	588.358	5.54785	85.5671	100 - 34.4 - 7.18 - 1.11 - 0.14
Blumenol C O-[apiosyl-(1->6)-glucoside]	505.261	5.54785	84.799	100 - 26.8 - 5.72 - 0.891 - 0.118
Monic acid	307.19	5.56383	83.3257	100 - 20 - 3.14 - 0.36
MG(13:0/0:0/0:0)	306.263	5.58782	96.1441	100 - 17.8 - 2.32 - 0.225
2,3-Dihydroxycarbamazepine	233.072	5.58782	82.4213	100 - 17.2 - 2.01 - 0.176
Quillaic acid 3-[xylosyl-(1->3)-[galactosyl-(1->2)]-glucuronide]	974.494	5.60377	81.2179	100 - 52.4 - 17.6 - 4.41 - 0.911 - 0.161
Curdione	219.174	5.60377	91.1788	100 - 16.6 - 1.7 - 0.13
Dactimicin	397.256	5.61952	88.6805	100 - 22.3 - 3.61 - 0.436
L-Histidine trimethylbetaine	395.24	5.61952	98.4252	100 - 11.1 - 0.97
N-Docosahexaenoyl Tryptophan	514.322	5.63548	70.603	100 - 37 - 7.27 - 1 - 0.108
1,4-Dihydroxynonane	362.326	5.63548	90.4184	100 - 10 - 0.862
13-Tetradecene-1,3-diyne-6,7-diol	203.143	5.63548	89.1315	100 - 15.4 - 1.52 - 0.113
12-Hydroxydodecanoic acid	450.378	5.63548	98.2401	100 - 13.4 - 1.44 - 0.113
Blumenol C O-[rhamnosyl-(1->6)-glucoside]	519.278	5.63548	78.1115	100 - 27.9 - 6.02 - 0.954 - 0.128
[6]-Gingerdione	602.374	5.64303	94.3003	100 - 18.8 - 2.49 - 0.247
Palmitic acid	274.274	5.64303	97.5157	100 - 17.7 - 1.89 - 0.15
Fludrocortisone acetate	387.199	5.64303	79.7156	100 - 25.5 - 4.34 - 0.555
3-(2-Carboxyethylthio)-3-(2-(8-phenyloctyl)phenyl)propanoic acid	475.251	5.64303	75.1954	100 - 29.5 - 9.53 - 1.92 - 0.299
Delmopinol	272.258	5.65102	90.4173	100 - 18.1 - 1.96 - 0.157
Arlatin	533.31	5.65102	84.0726	100 - 16.6 - 2.12 - 0.199
Theasapogenol E	487.341	5.659	81.7174	100 - 33.2 - 6.58 - 0.964 - 0.114
Tridecanol	242.248	5.659	91.0188	100 - 14.4 - 1.17
16-Hydroxyhexadecanoic acid	290.269	5.659	96.9675	100 - 17.8 - 2.1 - 0.187
N,N-Dimethyldodecylamine-N-oxide	230.248	5.659	94.3303	100 - 15.9 - 1.39
Heptadecanoic acid	288.289	5.667	95.7434	100 - 18.9 - 2.09 - 0.171
MG(i-19:0/0:0/0:0)	390.357	5.6829	93.6149	100 - 24.5 - 3.68 - 0.414
Methantheline	703.365	5.69085	86.2174	100 - 23.5 - 3.25 - 0.333
Corosin	483.31	5.69085	82.4545	100 - 33.2 - 6.79 - 1.03 - 0.127
Sphinganine	302.305	5.69085	96.3265	100 - 20.4 - 2.38 - 0.203
Styrene	105.07	5.69883	96.807	100 - 8.74 - 0.336
Tuberculostearic acid	316.321	5.69883	94.6428	100 - 21.1 - 2.52 - 0.22
Plipastatin	732.404	5.69883	92.9489	100 - 84.3 - 39.2 - 13.1 - 3.47 - 0.776 - 0.151
Petroselinic acid	300.289	5.69883	84.8548	100 - 19.9 - 2.29 - 0.194
Ganglioside GM1 (d18:0/14:0)	746.42	5.7068	87.4241	100 - 79.1 - 37.2 - 13 - 3.66 - 0.884 - 0.188
P-Tolualdehyde	121.065	5.7068	93.9437	100 - 8.78 - 0.544
Spisulosine	286.31	5.73067	87.3709	100 - 20.3 - 2.16 - 0.161
Dehydrocurdione	469.331	5.73067	84.4769	100 - 16.6 - 1.69 - 0.13
Nummularine A	680.399	5.73867	83.51	100 - 41.6 - 9.65 - 1.62 - 0.217
Jasmolone	145.101	5.75467	88.3055	100 - 12.2 - 1.09
Momordol	485.325	5.75467	62.4831	100 - 28.9 - 5.04 - 0.654
4-Heptyloxyphenol	173.132	5.75467	86.4053	100 - 14.4 - 1.37
Arachidic acid	330.336	5.77062	95.8281	100 - 22.2 - 2.75 - 0.247
Cucurbitacin S	499.305	5.77062	59.5614	100 - 33.2 - 6.55 - 0.959 - 0.113
MJDBISSP00000002	403.361	5.77825	94.0501	100 - 25.9 - 4.03 - 0.467
Behenic acid	358.368	5.7862	95.0618	100 - 24.4 - 3.25 - 0.311
Cerebronic acid	402.394	5.7862	94.4095	100 - 26.6 - 4.02 - 0.442
HECOGENIN ACETATE	455.315	5.7862	98.5813	100 - 32.1 - 6 - 0.825
DHAP(18:0)	469.294	5.80215	80.9836	100 - 23.5 - 4.07 - 0.524
17-Estradiol cyclooctyl acetate	457.331	5.80215	91.6214	100 - 30.9 - 5.21 - 0.63
Melleolide B	415.211	5.81012	94.2428	100 - 26.6 - 4.83 - 0.659
Carotol	240.232	5.81012	96.8511	100 - 16.6 - 1.49
Cocamidopropyl Betaine	343.295	5.81012	95.3465	100 - 21.8 - 2.89 - 0.284
Dodecanoic acid	439.32	5.81012	85.5362	100 - 13.3 - 1.23
M-Xylene	107.086	5.81012	92.2565	100 - 8.77 - 0.338
Chavicol	135.081	5.81012	96.702	100 - 9.89 - 0.642
Beta-Alanyl-L-lysine	435.289	5.81805	96.5406	100 - 11.2 - 1.18
Phaseic acid	281.138	5.81805	88.928	100 - 16.6 - 2.32 - 0.233
Nerol	172.169	5.83397	89.4298	100 - 11.1 - 0.759
3-Hydroxy-10'-apo-b,y-carotenal	425.305	5.84987	94.6474	100 - 29.7 - 4.66 - 0.512
N-Palmitoyl Proline	371.326	5.84987	82.9131	100 - 23.6 - 3.29 - 0.337
2-(Methylthio)benzothiazole	182.009	5.86588	82.3368	100 - 10.7 - 9.56 - 0.91 - 0.286
3,5,5-Trimethyl-1,2-cyclohexanedione	177.088	5.86588	92.2617	100 - 9.97 - 0.855
6-Methoxymellein	209.081	5.86588	92.6116	100 - 12.2 - 1.5 - 0.123
Diethyl Phthalate	205.086	5.86588	94.0736	100 - 13.3 - 1.64 - 0.139
3,4-Methylenedioxybenzoic acid	149.023	5.86588	96.5529	100 - 8.87 - 1.17
Diisobutyl phthalate	279.159	5.86588	96.2882	100 - 17.7 - 2.3 - 0.222
Linolenic Acid	296.258	5.87388	90.7008	100 - 19.9 - 2.28 - 0.193
Scymnol	486.378	5.88987	84.8763	100 - 30 - 5.57 - 0.772
Eucarvone	133.101	5.89785	92.3753	100 - 11 - 0.754
4-Piperidinone, 1-hydroxy-2,2,6,6-tetramethyl-	172.133	5.90582	94.4915	100 - 10.4 - 0.895
Octaethyleneglycol monododecyl ether	556.441	5.91377	92.6461	100 - 31.3 - 6.58 - 1.04 - 0.135
Polidocanol	600.467	5.91377	91.4901	100 - 33.5 - 7.5 - 1.26 - 0.174
N-Nervonoyl Histidine	526.395	5.91377	86.9609	100 - 34.3 - 6.31 - 0.822
Heptaethylene glycol monododecyl ether	512.415	5.92172	92.2544	100 - 29 - 5.71 - 0.842 - 0.102
1-O-Hexadecyl-sn-glycero-3-phosphocholine	545.365	5.9377	77.044	100 - 27.1 - 4.78 - 0.631
4alpha-carboxy-5alpha-cholesta-8,24-dien-3beta-ol	441.334	5.9377	85.074	100 - 30.9 - 5.22 - 0.632
Arctiol	254.248	5.9457	94.1102	100 - 17.7 - 1.67 - 0.112
Tetraethylene Glycol Monododecyl Ether	380.337	5.95368	83.6406	100 - 22.3 - 3.4 - 0.388
Sclareol oxide	280.263	5.95368	96.7474	100 - 19.9 - 2.07 - 0.151
Alpha-Terpineol propanoate	228.196	5.9774	93.1227	100 - 14.4 - 1.37
(Z)-9-Cycloheptadecen-1-one	268.263	5.9774	86.3556	100 - 18.8 - 1.87 - 0.131
2,3-Dimethyl-2-cyclohexen-1-one	142.123	5.98538	92.4998	100 - 8.83 - 0.548
Hexadecenal	256.263	5.99337	97.0692	100 - 17.7 - 1.68 - 0.113
Cis-Quinceoxepane	198.185	5.99337	88.4658	100 - 13.2 - 1.01
4-(2,6,6-Trimethyl-1-cyclohexen-1-yl)-2-butanone	212.201	5.99337	88.5398	100 - 14.4 - 1.16
3-Methyl-2-cyclohexen-1-one	128.107	5.99337	92.4326	100 - 7.72 - 0.463
11-Aminoundecanoic Acid	184.169	5.99337	88.4754	100 - 12.6 - 1.14
(E)-6,10-Dimethyl-9-methylene-5-undecen-2-one	226.216	5.99337	88.4681	100 - 15.5 - 1.32
D-(+)-dihydrocarvone	170.154	5.99337	89.4502	100 - 11 - 0.756
Isophorone	156.138	6.00135	90.4327	100 - 9.93 - 0.646
21-Desacetyl Deflazacort	382.203	6.00928	93.7808	100 - 25.8 - 4.21 - 0.516
Manoyl oxide	308.295	6.00928	82.9609	100 - 22.1 - 2.52 - 0.199
Dodemorph	563.55	6.00928	90.9926	100 - 20.3 - 2.15 - 0.16
Dioctyl Phthalate	391.284	6.03287	82.0878	100 - 26.5 - 4.21 - 0.493
Armillaripin	437.193	6.04085	94.3479	100 - 26.5 - 4.61 - 0.602
Octadecanamide	284.294	6.0647	95.7073	100 - 20.3 - 2.16 - 0.16
Geranylcitronellol	310.31	6.0647	96.7549	100 - 22.1 - 2.53 - 0.2
Calcitroic acid	413.211	6.07268	79.7593	100 - 25.4 - 3.92 - 0.449
5-((6-((Aminomethyl)amino)-1-oxohexyl)amino)pentanoic acid	608.384	6.07268	95.1617	100 - 14.8 - 1.64 - 0.135
2,5-Heptadien-1-ol	95.0859	6.12822	94.3298	100 - 7.75 - 0.465
Dopamine	118.065	6.13618	94.4678	100 - 9.22 - 0.789
Sebacic Acid	185.117	6.13618	92.6605	100 - 11.2 - 1.39 - 0.109
9,10-DHOME	315.252	6.13618	93.709	100 - 20 - 2.72 - 0.277
1-O-Isopentyl-3-O-octadec-2-enoyl glycerol	427.378	6.13618	97.7086	100 - 28.8 - 4.83 - 0.594
4,4'-Dioctyldiphenylamine	394.346	6.13618	90.6955	100 - 31.1 - 4.69 - 0.453
Cuminaldehyde	149.096	6.13618	89.7841	100 - 11 - 0.751
Octanoate	287.221	6.1441	97.2257	100 - 8.9 - 0.76
Oleandomycin	652.41	6.24723	76.2665	100 - 39.4 - 10 - 1.91 - 0.299
Leucomycin	666.39	6.2871	80.4198	100 - 39.4 - 10.2 - 1.99 - 0.32
Menthol-glucoronide	671.345	6.30307	91.6251	100 - 17.9 - 2.73 - 0.299
PG(i-12:0/i-17:0)	663.453	6.30307	93.1523	100 - 39 - 9.47 - 1.71 - 0.253
THYMOPENTIN	680.37	6.33503	79.6248	100 - 36.6 - 8.38 - 1.43 - 0.199
Phytosphingosine	340.282	6.37475	86.8694	100 - 20.4 - 2.59 - 0.246
Lauramine Oxide	230.248	6.39073	92.7619	100 - 15.9 - 1.39
24-Hydroxytetracosanoic acid	402.394	6.39073	85.6478	100 - 26.6 - 4.02 - 0.442
Monoisobutyl Phthalate	205.086	6.39073	89.5537	100 - 13.3 - 1.64 - 0.139
Nonadecanoic acid	316.321	6.39073	87.1143	100 - 21.1 - 2.52 - 0.22
Benzoquinoneacetic acid	149.023	6.39073	94.6487	100 - 8.87 - 1.17
Dibutyl Phthalate	279.159	6.39073	95.5558	100 - 17.7 - 2.3 - 0.222
Capsiamide	302.305	6.39073	97.3374	100 - 19.2 - 1.95 - 0.139
Brassidic acid	356.352	6.39073	89.9537	100 - 24.4 - 3.25 - 0.31
Polyoxyethylene 40 monostearate	346.331	6.39073	95.3663	100 - 22.2 - 2.96 - 0.294
22-Hydroxydocosanoic acid	374.362	6.39073	91.8664	100 - 24.4 - 3.47 - 0.362
Decyl alcohol	358.368	6.39073	95.7787	100 - 11.1 - 0.764
SM(d18:2(4E,14Z)/TXB2)	430.264	6.39873	77.8332	100 - 48.5 - 13.6 - 2.78 - 0.458
2-Methylhexadecanoic acid	288.289	6.39873	94.0496	100 - 18.9 - 2.09 - 0.171
SM(d20:1/TXB2)	445.288	6.39873	82.783	100 - 50.8 - 14.7 - 3.09 - 0.522
N-Dodecylsarcosinate	290.269	6.39873	97.7982	100 - 17 - 1.77 - 0.138
3-(N-n-Octadecylcarbamoyloxy)-2-methoxypropyl-2-thiazolinium ethyl phosphate	637.305	6.40673	77.4819	100 - 32.7 - 11.1 - 2.44 - 0.431
9,10-Dihydroxystearic acid	334.295	6.40673	92.1032	100 - 20 - 2.72 - 0.278
4-Propylphenol	119.086	6.40673	94.5993	100 - 9.91 - 0.644
Auxin b	352.251	6.40673	89.7325	100 - 20 - 2.71 - 0.276
Tropolone A	432.238	6.40673	95.9556	100 - 26.9 - 4.72 - 0.62
Ganoderic acid B	517.316	6.40673	60.2172	100 - 33.2 - 6.78 - 1.03 - 0.127
Netilmicin	489.315	6.41473	93.0943	100 - 25.3 - 4.51 - 0.601
Citrulline	373.183	6.41473	91.9653	100 - 7.85 - 0.887
Melleolide G	415.211	6.41473	87.006	100 - 26.6 - 4.83 - 0.659
(3R,5Z)-5-Octene-1,3-diol	306.263	6.4307	92.4651	100 - 8.91 - 0.761
7,8-diaminopelargonate	171.149	6.4307	89.519	100 - 10.8 - 0.937
Gamma-Linolenic Acid	296.258	6.44662	85.6037	100 - 19.9 - 2.28 - 0.193
5-Oxoicosa-3,6,8-trienoic acid	658.507	6.46257	91.8093	100 - 22.1 - 2.94 - 0.291
Sphingosylphosphorylcholine	487.323	6.47838	86.9761	100 - 26.4 - 4.37 - 0.541
PA(8:0/i-16:0)	501.339	6.48633	76.6343	100 - 30.1 - 6.02 - 0.903 - 0.111
3a,6b,7a,12a-Tetrahydroxy-5b-cholanoic acid	457.313	6.49428	80.6399	100 - 26.6 - 4.64 - 0.607
Butyl 4-[(2-ethoxy-4-oxo-6,7,8,9-tetrahydroquinolizine-1-carbonyl)amino]benzoate	413.211	6.60525	80.9262	100 - 26.1 - 4.3 - 0.53
Hexanal	142.123	6.89022	95.2898	100 - 6.67 - 0.393
Cyclohexane	102.128	6.89952	93.951	100 - 6.63 - 0.185
15-Methylpalmitate	288.289	7.06235	82.5669	100 - 18.9 - 2.09 - 0.171
Triethylenemelamine	237.145	7.15798	88.7034	100 - 12.1 - 0.671
(4S,8R)-8,9-Dihydroxy-p-menth-1(6)-en-2-one	207.099	7.1893	89.0554	100 - 11.1 - 1.18
2-Aminopurine	177.088	7.1893	95.621	100 - 7.29 - 0.233
(2R,3R,4R)-2-Amino-4-hydroxy-3-methylpentanoic acid	130.086	7.20505	93.803	100 - 7.12 - 0.834
Dalfopristin	655.314	7.20505	74.8551	100 - 40 - 14.1 - 3.49 - 0.691 - 0.113
Menthyl ethylene glycol carbonate	245.174	7.20505	88.816	100 - 14.5 - 1.8 - 0.159
DG(i-24:0/8:0/0:0)	551.503	7.20505	85.0741	100 - 38.8 - 8.36 - 1.3 - 0.159
N-Acetylleucine	206.139	7.20505	92.32	100 - 9.3 - 1
2,2',2''-Nitrilotriethanol	150.112	7.20505	96.9653	100 - 7.14 - 0.836
Cubebin	379.113	7.213	83.2284	100 - 22.1 - 3.56 - 0.427
2-Hydroxypyridine	113.071	7.213	94.1473	100 - 5.87 - 0.348
S-Petasin	357.147	7.213	90.1899	100 - 21.8 - 7.39 - 1.23 - 0.165
4-Acetyl-1-methylcyclohexene	139.112	7.213	92.0426	100 - 9.93 - 0.646
Diethanolamine	106.087	7.221	94.8757	100 - 4.89 - 0.507
Jangomolide	507.137	7.221	91.1084	100 - 28.7 - 5.62 - 0.825
(-)-Arctigenin	411.118	7.221	90.9183	100 - 23.2 - 3.81 - 0.467
(S)-Nerolidol 3-O-[a-L-rhamnopyranosyl-(1->2)-b-D-glucopyranoside]	575.283	7.221	89.7526	100 - 30.1 - 6.43 - 1.03 - 0.136
Rubschisandrin	439.15	7.221	93.5069	100 - 25.4 - 4.33 - 0.554
Porson	425.134	7.221	92.3536	100 - 24.3 - 4.06 - 0.509
Latrunculin B	413.211	7.221	82.368	100 - 23.3 - 8.15 - 1.44 - 0.217
PGP(i-15:0/PGF1alpha)	871.469	7.23698	90.6057	100 - 45.9 - 13.6 - 3 - 0.548
PGP(PGF1alpha/i-14:0)	857.453	7.24498	83.2472	100 - 44.7 - 13.1 - 2.86 - 0.516
Statine	158.118	7.26868	95.7953	100 - 9.33 - 1
Policapram	98.0968	7.2925	93.0578	100 - 7.04 - 0.418
Aminoacetone	74.0606	7.32407	96.1673	100 - 3.73 - 0.257
Aniline	94.0655	7.34002	98.2414	100 - 6.94 - 0.205
Oxindole	134.06	7.40402	91.1478	100 - 9.14 - 0.575
L-Hypoglycin A	106.065	7.46753	91.8783	100 - 8.14 - 0.701
Ganglioside GM1 (d18:0/12:0)	732.404	7.49942	82.4461	100 - 76.9 - 35.5 - 12.2 - 3.39 - 0.808 - 0.169
2-Aminobenzoic Acid	120.045	7.63438	91.9203	100 - 8.09 - 0.697
2-Methyl-3-oxopropanoic acid	85.0288	7.97672	95.0531	100 - 4.51 - 0.695
Beta-Thujaplicin	165.091	8.00058	89.2931	100 - 11 - 0.961
(S)-5-Hydroxymethyl-2[5H]-furanone	115.039	8.00058	94.0427	100 - 5.59 - 0.744
3-Hydroxysebacic acid	236.149	0.6018	97.5604	100 - 11.2 - 1.6 - 0.132
2-Aminobutan-1-ol	72.0813	0.6416	98.4082	100 - 4.86 - 0.299
Cinnamic acid	166.086	1.8711	98.1642	100 - 9.9 - 0.849
4-Pyridoxolactone	198.076	2.3167	92.4674	100 - 9.21 - 0.993
1H-Pyrrole-3-carboxamide, 5-((5-fluoro-1,2-dihydro-2-oxo-3H-indol-3-ylidene)methyl)-N-((2S)-2-hydroxy-3-(4-morpholinyl)propyl)-2,4-dimethyl-	460.238	3.0077	92.34	100 - 26.8 - 4.28 - 0.505
Farnesylcysteine	326.217	3.1269	77.2884	100 - 21.1 - 7.04 - 1.14 - 0.143
(2R,4S)-4-Carbamimidamido-3-acetamido-2-((1R,2R)-2-hydroxy-1-methoxy-3-(octanoyloxy)propyl)-3,4-dihydro-2H-pyran-6-carboxylic acid	490.286	3.1349	95.4913	100 - 24.9 - 4.62 - 0.635
6-Deoxy-4-O-(3,6-di-O-methyl-beta-D-glucopyranosyl)-2,3-di-O-methyl-alpha-L-mannopyranose	400.217	3.5963	85.9726	100 - 18 - 3.59 - 0.451
DG(a-15:0/6 keto-PGF1alpha/0:0)	357.235	3.7318	89.6889	100 - 42.2 - 10.5 - 1.94 - 0.289
3-(6'-methylthio)hexylmalate	542.213	3.7715	89.5329	100 - 13.1 - 6.34 - 0.719 - 0.112
(2S)-2-Cyclopentyl-2-[4-[(2,4-dimethylpyrido[2,3-b]indol-9-yl)methyl]phenyl]-N-[(1S)-2-hydroxy-1-phenylethyl]acetamide	532.296	3.7794	81.362	100 - 39.5 - 7.99 - 1.11 - 0.117
Lysyl-Phenylalanine	650.359	3.9624	96.0306	100 - 17.7 - 2.09 - 0.186
PE(18:1(12Z)-O(9S,10R)/22:5(7Z,10Z,13Z,16Z,19Z))	414.761	4.0023	79.2989	100 - 50.3 - 14.2 - 2.91 - 0.477
PE(22:4(7Z,10Z,13Z,16Z)/20:3(8Z,11Z,14Z)-2OH(5,6))	436.774	4.074	80.6506	100 - 52.5 - 15.6 - 3.35 - 0.576
PA(22:2(13Z,16Z)/PGE2)	435.251	4.114	84.1519	100 - 50 - 14.5 - 3.08 - 0.527
PE(6 keto-PGF1alpha/22:6(4Z,7Z,10Z,13Z,16Z,19Z))	450.753	4.1459	84.603	100 - 52.5 - 16 - 3.57 - 0.641
PS(MonoMe(11,5)/DiMe(13,5))	480.8	4.2097	80.6474	100 - 57 - 18.4 - 4.32 - 0.813 - 0.129
PC(LTE4/22:3(10Z,13Z,16Z))	516.315	4.3136	78.3007	100 - 61.4 - 25.3 - 7.8 - 1.92 - 0.392
PC(PGE1/18:2(9Z,12Z))	450.772	4.3853	91.077	100 - 51.5 - 15.2 - 3.3 - 0.574
PC(TXB2/22:5(4Z,7Z,10Z,13Z,16Z))	472.784	4.4413	86.0244	100 - 55.9 - 17.8 - 4.12 - 0.767 - 0.12
(5Z)-7-[(1R,2R,3R)-3-Hydroxy-2-[(1E,3S)-3-hydroxy-5-phenylpent-1-en-1-yl]-5-oxocyclopentyl]hept-5-enoylcarnitine	530.316	4.9526	93.9167	100 - 33.6 - 6.9 - 1.06 - 0.131
Geniposide	421.168	5.0081	85.2329	100 - 19 - 3.77 - 0.487
Veratrine	574.342	5.0164	92.296	100 - 35.9 - 8.1 - 1.37 - 0.188
15(S)-Hydroxyeicosatrienoic acid	345.238	5.4211	88.1837	100 - 22.1 - 2.95 - 0.292
11-Hydroxydodecanoylcarnitine	377.298	5.8181	96.1764	100 - 21.5 - 3.23 - 0.364
Fucoxanthinol	634.451	5.8819	79.7367	100 - 44.1 - 10.5 - 1.78 - 0.237
PS(15:0/20:0)	760.541	5.8979	83.8092	100 - 46 - 12.4 - 2.46 - 0.394
3-Dehydrosphinganine	282.279	5.9934	96.8975	100 - 20.3 - 2.37 - 0.203
PG(i-12:0/a-15:0)	675.422	6.0488	76.7065	100 - 36.8 - 8.64 - 1.52 - 0.218
DG(16:1(9Z)/15:0/0:0)	570.508	6.2155	87.7463	100 - 37.7 - 7.94 - 1.21 - 0.146
(Z)-7-[(1S,4R,6R)-4-[(E)-Oct-6-enyl]-2,3-diazabicyclo[2.2.1]hept-2-en-6-yl]hept-5-enoic acid	365.277	6.3667	84.9145	100 - 22.8 - 2.89 - 0.265
Phytanic acid	330.336	6.3907	94.3623	100 - 22.2 - 2.75 - 0.247
MG(20:5(5Z,8Z,11Z,14Z,17Z)/0:0/0:0)	376.259	6.4227	79.9238	100 - 25.4 - 3.92 - 0.45
CL(8:0/11:0/13:0/i-14:0)	562.342	6.4387	71.6642	100 - 61.4 - 22 - 5.8 - 1.23 - 0.223
3-Gonal	278.248	6.4626	83.3436	100 - 19.8 - 2.07 - 0.15
Diosbulbin D	383.087	7.221	87.4302	100 - 21 - 3.33 - 0.391

## Sheet: neg
Description	m/z	Retention time (min)	Isotope Similarity	Theoretical Isotope Distribution
Fipronil	470.905	0.415	59.4009	100 - 15.3 - 69.7 - 10.5 - 14 - 2.04 - 0.645
Arctinol	300.975	0.458667	81.8972	100 - 15.9 - 10.6 - 1.48 - 0.386
MALEAMIC ACID	96.0102	0.466483	94.7202	100 - 4.86 - 0.711
2,3-Dihydroxypropanamide	104.034	0.505617	96.6541	100 - 3.8 - 0.671
D-Sorbitol	181.071	0.5213	95.084	100 - 6.88 - 1.43
Aspartic Acid	132.03	0.529117	96.4696	100 - 4.92 - 0.919
Phosphate	96.9688	0.529117	99.0011	100 - 0.187 - 0.822
L-Glutamic Acid	146.045	0.53695	95.9768	100 - 6.03 - 0.974
Safrolglycol	217.048	0.544767	90.8606	100 - 11.1 - 1.38 - 0.108
Galactinol	377.086	0.568267	94.9863	100 - 13.7 - 3.12 - 0.341
Ascorbic acid	351.058	0.583867	98.0146	100 - 6.81 - 1.43
Glyceric Acid	105.019	0.591683	95.99	100 - 3.47 - 0.864
Fructose lactate	267.073	0.591683	92.6897	100 - 10.3 - 2.32 - 0.202
Methyl sulfate	110.975	0.591683	93.0802	100 - 2.08 - 5.35
4',5,6-Trimethylscutellarein 7-glucoside	525.114	0.600117	87.1505	100 - 26.7 - 5.68 - 0.882 - 0.117
N-Succinyl-L,L-2,6-diaminopimelate	325.078	0.600117	90.0128	100 - 13.1 - 2.23 - 0.217
Cefpirome	559.106	0.600117	84.3395	100 - 28 - 13.9 - 3.08 - 0.726 - 0.123
Myo-Inositol	179.056	0.600117	93.3162	100 - 6.86 - 1.43
B-D-Xylopyranosyl-(1->4)-a-L-rhamnopyranosyl-(1->2)-L-arabinose	463.123	0.600117	94.3783	100 - 18.1 - 4.22 - 0.566
(S)-3-Hydroxyisobutyric acid	149.045	0.600117	97.5177	100 - 4.53 - 0.696
BETA-D-LACTOSE	341.109	0.600117	89.9739	100 - 13.7 - 3.12 - 0.341
Raltitrexed	457.121	0.60795	82.6812	100 - 25.5 - 8.86 - 1.67 - 0.267
6-Thiourate	182.997	0.60795	88.2272	100 - 7.79 - 5.2 - 0.353
Malic Acid	133.014	0.623583	95.7296	100 - 4.59 - 1.11
A-L-Arabinofuranosyl-(1->2)-[a-D-mannopyranosyl-(1->6)]-D-mannose	473.152	0.779833	90.0898	100 - 19.3 - 4.85 - 0.695 - 0.103
Uridine	487.131	0.862033	97.9111	100 - 10.8 - 1.77 - 0.149
Benzoyl glucuronide (Benzoic acid)	343.067	0.91055	86.8608	100 - 14.5 - 2.62 - 0.279
Mometasone	471.136	1.01043	49.5609	100 - 24.3 - 67.6 - 15.9 - 12.6 - 2.74 - 0.395
Eravacycline	595.165	1.03225	80.6247	100 - 31.3 - 6.39 - 0.977 - 0.122
L-Erythrulose	119.034	1.04448	97.3233	100 - 4.57 - 0.903
Alpha-D-Xylopyranosyl-(1->6)-beta-D-glucopyranosyl-(1->4)-D-glucose	473.152	1.05632	87.135	100 - 19.3 - 4.85 - 0.695 - 0.103
Indacaterol-8-O-glucuronide	605.194	1.06732	83.3954	100 - 33.9 - 7.43 - 1.22 - 0.164
Quinic Acid	191.056	1.14668	94.1661	100 - 7.94 - 1.51 - 0.103
4-Pyridoxic acid	228.051	1.15813	90.5155	100 - 9.27 - 1.2
2-Pyrimidine Acetic Acid	137.035	1.19428	98.0369	100 - 7.37 - 0.646
Threonic Acid	135.029	1.33235	94.5904	100 - 4.61 - 1.11
Mesylate	94.98	1.35803	93.2924	100 - 2.04 - 5.15
Xanthine	151.026	1.36697	92.924	100 - 6.99 - 0.623
Deoxyuridine	501.147	1.4322	96.2593	100 - 10.8 - 1.56 - 0.126
Shikimic acid	173.045	1.46575	94.9892	100 - 7.88 - 1.3
Citramalic Acid	147.029	1.46575	94.3653	100 - 5.69 - 1.16
Pseudouridine	487.131	1.48518	97.0464	100 - 10.8 - 1.77 - 0.149
S-Acetyldihydrolipoamide	230.067	1.66847	81.7244	100 - 13.1 - 10.2 - 1.19 - 0.35
Alpha-Hydroxyisobutyric Acid	103.039	1.76507	95.747	100 - 4.53 - 0.696
3-Amino-2,3-dihydrobenzoic acid	184.061	1.78472	93.2517	100 - 8.12 - 0.699
2-Oxo-4-methylthiobutanoic acid	193.018	1.79767	89.91	100 - 6.41 - 5.31 - 0.296
2-Oxoadipic Acid	159.03	1.80757	93.707	100 - 6.77 - 1.22
Thienamycin	603.179	1.81108	87.8761	100 - 13.8 - 6.22 - 0.733 - 0.104
Indolelactic acid	250.072	1.81108	87.7668	100 - 12.5 - 1.33 - 0.102
3-Keto-b-D-galactose	177.04	1.82048	95.0889	100 - 6.83 - 1.43
Rhamnose	163.061	1.82687	97.065	100 - 6.82 - 1.22
Osmundalactone	173.045	1.82687	97.8231	100 - 6.7 - 0.806
Norepinephrine	214.072	1.82687	95.0341	100 - 9.26 - 0.998
Resorcinol	109.029	1.83278	95.613	100 - 6.63 - 0.596
Inosine	267.074	1.83725	90.3526	100 - 12.6 - 1.76 - 0.155
6-Hydroxyhexanoic acid	131.071	1.91257	94.8046	100 - 6.74 - 0.809
2-Isopropylmalic Acid	175.061	1.93372	98.1386	100 - 7.9 - 1.3
Leurubicin	691.231	2.01292	87.1726	100 - 37.3 - 9.24 - 1.72 - 0.263
Carboxyethylphosphoramide	188.02	2.07112	94.9926	100 - 4.57 - 0.701
Rutacridone epoxide	691.231	2.16965	95.7858	100 - 21.3 - 2.97 - 0.312
5-Hydroxy-N-formylkynurenine	287.045	2.18737	89.3835	100 - 13 - 1.8 - 0.161
MJDBISSN00000009	169.103	2.20203	95.2501	100 - 10.2 - 0.882
Protocatechuic acid 4-glucoside	315.073	2.20795	93.8625	100 - 14.6 - 2.84 - 0.31
Itaconic acid	259.046	2.20795	97.3632	100 - 5.63 - 0.951
Mequinol	123.044	2.20795	93.5899	100 - 7.74 - 0.67
3-Methoxy-4-hydroxyphenylethyleneglycol sulfate	309.029	2.2648	90.3521	100 - 10.9 - 6.5 - 0.631 - 0.124
(2R,3S)-Piscidic acid	301.057	2.2688	91.9463	100 - 12.3 - 2.13 - 0.2
4-Hydroxy-5-(dihydroxyphenyl)-valeric acid-O-methyl-O-sulphate	381.05	2.29117	88.5286	100 - 14.3 - 7.32 - 0.913 - 0.176
Biotin sulfone	311.045	2.32418	94.268	100 - 12.7 - 6.29 - 0.696 - 0.109
3-Hydroxy-4-butanolide	245.067	2.42808	95.0378	100 - 11.3 - 2.22 - 0.203
3-Methoxyanthranilate	212.056	2.44442	93.4925	100 - 9.24 - 0.996
Vanillylamine	198.077	2.45832	98.682	100 - 9.22 - 0.789
D-glycero-L-galacto-Octulose	221.067	2.45832	97.1598	100 - 9.14 - 2.01 - 0.158
Galactosylglycerol	275.076	2.47907	93.3471	100 - 10.2 - 2.12 - 0.181
S-4-Hydroxymephenytoin	271.05	2.54858	92.8423	100 - 14 - 1.52 - 0.122
Parasorbic acid	157.05	2.56593	99.1148	100 - 6.66 - 0.598
5-(3',5'-Dihydroxyphenyl)-gamma-valerolactone-O-sulphate-O-methyl	301.039	2.5744	90.1365	100 - 14.2 - 6.89 - 0.848 - 0.147
Dexpanthenol	204.124	2.5744	96.1258	100 - 10.5 - 1.32
Gamma-Aminobutyric acid-betaxanthin	331.071	2.58958	89.7018	100 - 15.2 - 2.31 - 0.234
Vulgaxanthin II	321.073	2.61862	95.3908	100 - 16.4 - 2.9 - 0.328
Paramethadione	138.055	2.67273	92.8261	100 - 8.18 - 0.909
Osmaronin	240.088	2.68565	90.0168	100 - 12.7 - 1.97 - 0.182
Gingerenone A	377.136	2.71723	93.8194	100 - 23.2 - 3.59 - 0.418
Nitrendipine	405.131	2.72027	93.3271	100 - 20.7 - 3.26 - 0.38
Ethyl (S)-3-hydroxybutyrate glucoside	275.114	2.7292	89.0647	100 - 13.5 - 2.49 - 0.254
Bergamottin	375.097	2.82308	84.3088	100 - 23.1 - 3.37 - 0.368
Cis-Acetylacrylate	273.062	2.82755	97.0694	100 - 5.59 - 0.744
Glucose 3-hydroxybutyrate	265.093	2.83202	97.1895	100 - 11.3 - 2.23 - 0.204
Isopropylmaleic acid	203.056	2.83202	97.8991	100 - 7.84 - 1.09
Adipic Acid	145.05	2.84603	95.5749	100 - 6.76 - 1.02
Curcumin I	377.136	2.86885	87.3009	100 - 25.4 - 4.32 - 0.552
Cassythicine	695.258	2.89217	86.5847	100 - 21.3 - 2.98 - 0.312
Avenanthramide A2	406.115	2.90858	92.8002	100 - 20.3 - 3.4 - 0.411
4,6-O-Ethylidene-D-glucose	205.072	2.91957	90.2881	100 - 9.04 - 1.59 - 0.119
Gibberellin A32	415.082	2.92755	87.6002	100 - 21.1 - 3.76 - 0.48
Prolylhydroxyproline	227.104	2.93395	84.9531	100 - 11.9 - 1.47 - 0.119
9-Oxo-nonanoic acid	217.108	2.93792	96.8905	100 - 10 - 1.07
MJDBISSN00000001	198.033	2.95627	74.4589	100 - 10.3 - 32.8 - 3.34 - 0.286
Morroniside	405.144	2.97425	89.7108	100 - 19.1 - 3.99 - 0.529
Glucosyl (E)-2,6-Dimethyl-2,5-heptadienoate	353.1	2.98067	94.2022	100 - 16.8 - 2.76 - 0.305
Schisandrin C	419.123	2.99757	87.1218	100 - 24.3 - 4.06 - 0.508
3-Deazaadenosine	247.083	3.014	87.513	100 - 13.7 - 1.69 - 0.146
1-Ipomeanol	213.077	3.03635	97.2325	100 - 9.99 - 1.06
Tuckolide Decarestrictine D	215.093	3.04277	91.4351	100 - 11.2 - 1.6 - 0.132
Erinapyrone A	187.061	3.05267	94.036	100 - 7.8 - 0.88
P-Toluenesulfonic Acid	171.012	3.05267	88.7122	100 - 8.58 - 5.46 - 0.411
10-(Phosphonooxy)decyl methacrylate	359.102	3.08998	96.3939	100 - 15.7 - 2.38 - 0.245
Difluprednate	545.179	3.13168	90.215	100 - 29.9 - 5.74 - 0.827
Maleylacetoacetic acid	181.014	3.14365	92.2436	100 - 8.97 - 1.59 - 0.118
Hydrocortisone phosphate	463.15	3.15115	86.1689	100 - 23.4 - 4.25 - 0.569
6-O-(6-Deoxy-alpha-L-mannopyranosyl)-beta-D-glucopyranose	711.253	3.17867	83.2443	100 - 13.6 - 2.91 - 0.312
Cotinine glucuronide	351.12	3.17867	90.2478	100 - 18.5 - 3.06 - 0.355
Pterosin J	287.06	3.22508	67.784	100 - 15.4 - 33.5 - 5.04 - 0.491
Biocytin	407.154	3.22508	87.6381	100 - 20 - 7.25 - 1.15 - 0.161
Caffeic acid 3-glucoside	387.094	3.23195	91.5218	100 - 16.8 - 3.17 - 0.374
Esculetin	177.019	3.23195	89.9116	100 - 9.96 - 1.26
Isopropyl apiosylglucoside	353.146	3.23932	97.4291	100 - 15.8 - 3.22 - 0.378
4-Hydroxy-3-methoxy-cinnamoylglycine	561.173	3.26213	92.0223	100 - 13.7 - 1.89 - 0.174
Bufotenine O-glucoside	403.128	3.27103	90.9189	100 - 20.7 - 3.27 - 0.382
Ryanodine	528.199	3.3087	93.974	100 - 28.2 - 5.66 - 0.851 - 0.106
3-Methyglutaric Acid	145.05	3.35858	93.7164	100 - 6.76 - 1.02
3-(3,4-Dihydroxyphenyl)lactic acid	179.035	3.3859	90.8382	100 - 10 - 1.48 - 0.115
Zapoterin	451.18	3.3934	87.681	100 - 28.8 - 5.63 - 0.827
Gartanin	377.136	3.40968	82.5902	100 - 25.4 - 4.32 - 0.552
L-1,2,3,4-Tetrahydro-beta-carboline-3-carboxylic acid	261.089	3.41813	98.2762	100 - 13.9 - 1.31
2-Amino-3-methylbenzoate	347.125	3.43057	93.3678	100 - 9.2 - 0.786
Prenyl glucoside	293.125	3.45688	91.3975	100 - 12.4 - 1.93 - 0.176
Linalool (8-hydroxydihydro-)	695.258	3.46282	95.4013	100 - 35.6 - 9.04 - 1.71 - 0.271
Homogentisic Acid	167.035	3.47908	97.0444	100 - 8.9 - 1.17
Hydroxygaleon	363.12	3.51388	89.6726	100 - 22.1 - 3.35 - 0.381
Triacetic acid	287.078	3.5239	97.0796	100 - 6.73 - 1.01
Fluticasone propionate	545.178	3.54115	89.4848	100 - 28.4 - 9.43 - 1.88 - 0.298
Phenylglyoxylic acid	195.03	3.54417	98.93	100 - 8.84 - 0.96
2,3-Dihydroxytoluene	123.044	3.54417	96.4795	100 - 7.74 - 0.67
Vanillin	151.04	3.54417	96.927	100 - 8.86 - 0.962
Terephthalic Acid	165.019	3.57682	98.5218	100 - 8.87 - 1.17
5-Benzylacyclouridine	321.11	3.6193	87.5673	100 - 16.2 - 2.05 - 0.191
3-(1-Hydroxymethyl-1-propenyl)pentanedioic acid	201.077	3.62327	90.9216	100 - 10.1 - 1.48 - 0.115
N1-(5-Phospho-a-D-ribosyl)-5,6-dimethylbenzimidazole	339.076	3.62872	86.3726	100 - 16.4 - 2.69 - 0.295
Furfuryl isovalerate	227.093	3.63715	93.0684	100 - 11.1 - 1.17
Mascaroside	561.173	3.64112	93.167	100 - 29 - 6.3 - 1.02 - 0.138
(3S)-3-hydroxycyclocitral	213.113	3.64655	95.0465	100 - 11.1 - 0.966
Elenaic acid	287.078	3.71615	95.0697	100 - 12.3 - 1.92 - 0.174
(-)-Epigallocatechin 3'-glucuronide	481.103	3.7311	88.2608	100 - 23.5 - 5.3 - 0.813 - 0.112
1,2-Cyclohexanediol	115.076	3.74833	98.6163	100 - 6.7 - 0.601
6',7'-Dihydroxybergamottin	393.131	3.75232	91.1484	100 - 23.2 - 3.81 - 0.467
Pimelic Acid	159.066	3.7587	99.3376	100 - 7.86 - 1.09
Arginyl-glycyl-aspartyl-phenylalanine	528.199	3.7587	93.0769	100 - 25.9 - 4.66 - 0.629
Lactacystin	411.097	3.77688	90.509	100 - 18.3 - 7.54 - 1.14 - 0.186
Thymidine	725.269	3.80162	80.8135	100 - 11.9 - 1.68 - 0.143
Homovanillic Acid	181.051	3.81895	91.6352	100 - 10 - 1.27
Dihydrodeoxy-8-epiaustdiol	267.088	3.8421	92.4072	100 - 13.3 - 1.64 - 0.139
2-Pyrocatechuic Acid	153.019	3.8421	96.4228	100 - 7.79 - 1.08
10-Chloromethyl-11-demethyl-12-oxo-calanolide A	409.082	3.8544	64.5981	100 - 23.1 - 35.5 - 7.81 - 1.18 - 0.136
L,L-Cyclo(prolylalanyl)	381.177	3.85838	98.6233	100 - 9.6 - 0.823
5,7-Dihydroxy-4H-1-benzopyran-4-one	223.025	3.8871	92.4237	100 - 9.96 - 1.26
3-Isopropylmalic acid	175.061	3.92603	94.2167	100 - 7.9 - 1.3
3-Hydroxypicolinic acid	337.068	3.94267	97.6106	100 - 7.03 - 0.828
Fasoracetam	241.119	3.94267	88.6095	100 - 11.8 - 1.05
Heptyl 4-hydroxybenzoate	281.14	3.96232	97.1493	100 - 15.5 - 1.73 - 0.145
Chlormidazole	301.076	3.97172	71.1039	100 - 17.1 - 33.3 - 5.54 - 0.441
3,4-Dimethylbenzenesulfonic acid	185.028	3.98257	93.7763	100 - 9.68 - 5.55 - 0.471
Herbimycin a	573.277	3.9904	90.9911	100 - 34 - 7.45 - 1.22 - 0.165
Ansamitocin P-3	679.263	4.01778	72.4296	100 - 36.2 - 40.2 - 13 - 2.81 - 0.467
3-Mercaptoheptyl acetate	425.204	4.01778	94.0113	100 - 10.8 - 5.46 - 0.512
7-Epi-12-hydroxyjasmonic acid	225.113	4.06213	95.9259	100 - 13.3 - 1.64 - 0.14
Tyramine	182.082	4.12388	97.4978	100 - 9.18 - 0.58
Prolylproline	469.23	4.15005	94.1859	100 - 11.8 - 1.26
Pantoyllactone glucoside	273.099	4.19108	94.4902	100 - 13.5 - 2.49 - 0.254
9-Hydroxymegastigma-4,6,7-trien-3-one	251.129	4.21533	91.6318	100 - 14.3 - 1.36
2-Hydroxyacetophenone	135.044	4.22668	96.8546	100 - 8.82 - 0.753
8-Amino-7-oxononanoic acid	186.113	4.24053	96.7267	100 - 10.4 - 1.1
Triletide	540.2	4.34327	89.1087	100 - 31.6 - 5.85 - 0.799
7-Deaza-2'-deoxyguanosine	303.052	4.36017	92.7446	100 - 13.7 - 1.69 - 0.146
(+/-)-Metalaxyl	557.282	4.37405	95.2188	100 - 17 - 2.18 - 0.207
1,4-Ipomeadiol	215.093	4.4669	97.8577	100 - 10 - 1.06
Remifentanil	397.172	4.5032	88.3007	100 - 22.9 - 3.53 - 0.408
Ichangin 4-glucoside	695.258	4.54643	88.5881	100 - 35.6 - 9.04 - 1.71 - 0.271
Cerivastatin lactone	881.461	4.5584	90.2523	100 - 29 - 4.88 - 0.602
HBOA trihexose	202.108	4.60153	90.86	100 - 9.27 - 0.793
Suberic Acid	173.082	4.60153	95.7335	100 - 8.97 - 1.18
Gibberellic Acid	345.135	4.62	87.7226	100 - 21 - 3.33 - 0.391
Araloside A	925.488	4.62	84.8785	100 - 52.4 - 17.1 - 4.19 - 0.838 - 0.144
PI(5-iso PGF2VI/20:1(11Z))	969.514	4.68577	82.296	100 - 52.4 - 16.7 - 3.98 - 0.77 - 0.127
PI(20:1(11Z)/PGF1alpha)	999.561	4.69995	84.9506	100 - 54.6 - 17.9 - 4.36 - 0.861 - 0.145
Apigenin 7-[p-coumaroyl-(->2)-[glucuronyl-(1->3)]-glucuronyl-(1->2)-glucuronide]	943.18	4.70538	88.2104	100 - 46.8 - 15.9 - 4 - 0.851 - 0.156
(1S,2S,4R,8S)-p-Menthane-1,2,8,9-tetrol 2-glucoside	365.182	4.70538	88.8414	100 - 18 - 3.37 - 0.413
Apigenin 7-O-diglucuronide	621.111	4.70538	91.0904	100 - 30.1 - 7.88 - 1.46 - 0.238
Pregnenolone sulfate	441.198	4.72505	82.8467	100 - 24.1 - 8.32 - 1.5 - 0.228
Decanedioic acid	201.113	4.77027	65.2322	100 - 11.2 - 1.39 - 0.109
Risperidone	409.209	4.83018	85.3181	100 - 26.7 - 3.84 - 0.392
Nicardipine	524.205	4.88825	92.9823	100 - 29.8 - 5.51 - 0.762
5-Hydroxyferulic acid	191.035	4.91322	91.799	100 - 11.1 - 1.59 - 0.131
Plumbagin	233.046	4.92872	92.6782	100 - 12.1 - 1.28
Paeonol	147.045	4.92872	95.32	100 - 9.96 - 1.06
Imazamethabenz-methyl	309.12	4.95938	86.5202	100 - 18.4 - 2.21 - 0.2
2-Keto-3-Deoxy-D-Mannooctanoic Acid	283.065	5.1019	97.8017	100 - 9.12 - 2.01 - 0.158
5-Hydroxytryptophol glucuronide	320.114	5.10638	95.1872	100 - 18.2 - 3 - 0.345
Feruloyl-2-hydroxyputrescine	315.109	5.16585	89.6492	100 - 16.3 - 2.06 - 0.192
2-Propyl-2,4-pentadienoic acid	185.082	5.1902	98.6337	100 - 8.87 - 0.757
4-Nitrophenol	138.019	5.26117	93.8447	100 - 7.03 - 0.828
N,N'-METHYLENEBISACRYLAMIDE	353.146	5.28807	96.441	100 - 8.49 - 0.729
P-Hydroxyubenimex	345.146	5.36338	85.4374	100 - 18.5 - 2.64 - 0.278
5-Hydroxybenzofuran-2(3H)-one	195.03	5.44382	98.2848	100 - 8.84 - 0.96
3-Hydroxybenzoic Acid	137.024	5.4513	97.4328	100 - 7.75 - 0.876
Chloroprocaine	307.063	5.46567	70.1642	100 - 15.1 - 33.4 - 4.93 - 0.476
10,11-dihydro-20-trihydroxy-leukotriene B4	367.213	5.46567	91.9468	100 - 22.3 - 3.81 - 0.479
Azelaic Acid	187.097	5.46917	96.4592	100 - 10.1 - 1.28
Enalapril	397.172	5.48788	82.4708	100 - 22.9 - 3.53 - 0.408
2,6-Dimethyl-7-octene-1,6-diol 8-O-glucoside	379.198	5.49972	87.3679	100 - 17.9 - 2.95 - 0.337
Mitomycin	315.109	5.49972	87.8145	100 - 18.1 - 2.57 - 0.268
Homocitrulline	423.224	5.51538	94.7757	100 - 8.95 - 0.974
Agar	317.125	5.51538	90.1611	100 - 15.8 - 3.01 - 0.344
(2S,3R,4R,6R,7S,8R,9R)-1,2,3,4,6,7,8,9-Octahydroxydecan-5-one	329.107	5.52033	93.8619	100 - 11.4 - 2.44 - 0.228
Gibberellin A15	375.182	5.52033	87.2467	100 - 22.1 - 3.14 - 0.336
(+/-)-Camphoric acid	245.103	5.52033	97.5643	100 - 11.2 - 1.39 - 0.108
Pyrenophorol	311.151	5.52382	84.3201	100 - 17.8 - 2.73 - 0.297
Abscisic Acid	263.129	5.52382	90.3112	100 - 16.6 - 2.11 - 0.199
PI(PGF1alpha/16:2(9Z,12Z))	943.455	5.53953	90.4984	100 - 50.2 - 15.6 - 3.63 - 0.688 - 0.112
Kanokoside A	475.183	5.53953	88.0831	100 - 23.5 - 5.11 - 0.769 - 0.103
Scopoletin	191.035	5.55522	89.8959	100 - 11.1 - 1.38 - 0.107
3,4-dihydroxyphenylacetic Acid	167.035	5.55522	96.6458	100 - 8.9 - 1.17
Padmatin	299.057	5.55522	94.6612	100 - 17.7 - 2.92 - 0.332
(d(CH2)51,Tyr(Me)2,Arg8)-Vasopressin	574.245	5.55522	76.1161	100 - 64.3 - 31.8 - 11.5 - 3.44 - 0.863 - 0.187
Apigenin	315.052	5.56305	88.5947	100 - 16.5 - 2.31 - 0.231
Zeranol	321.171	5.57877	89.0016	100 - 20 - 2.91 - 0.317
(R)-1-O-[b-D-Apiofuranosyl-(1->2)-b-D-glucopyranoside]-1,3-octanediol	481.265	5.57877	84.566	100 - 23.5 - 4.49 - 0.623
2-Mercaptobenzothiazole	165.979	5.59507	85.5144	100 - 9.6 - 9.45 - 0.805 - 0.277
7-(1-Imidazolyl)heptanoic acid	437.239	5.59507	95.4193	100 - 11.8 - 1.05
6-(4-sulfophenyl)octanoic Acid	299.096	5.59507	94.9203	100 - 16.4 - 6.8 - 0.931 - 0.138
PIP(5-iso PGF2VI/18:2(9Z,12Z))	491.222	5.60292	93.7834	100 - 50.3 - 16.3 - 3.95 - 0.789 - 0.135
6-Hydroxykaempferol 3,6-dimethylether	329.067	5.60292	85.7689	100 - 18.8 - 3.11 - 0.363
Porfiromycin	329.125	5.61073	92.6257	100 - 19.2 - 2.77 - 0.297
Panaxytriol	323.187	5.61858	91.8836	100 - 18.8 - 2.28 - 0.208
Cinncassiol A	809.397	5.6421	91.516	100 - 22.2 - 3.8 - 0.478
Pinolidoxin	337.166	5.6421	95.4158	100 - 20 - 3.13 - 0.359
Russelioside B	839.408	5.66558	86.4106	100 - 44.7 - 13.2 - 2.94 - 0.541
Tanacetol A	339.182	5.67342	84.8673	100 - 18.8 - 2.5 - 0.248
5-Hydroxycarvone	391.213	5.67342	97.0494	100 - 11.1 - 0.963
20-Cooh ltb4	361.203	5.6815	89.5262	100 - 23.3 - 3.83 - 0.47
Nepetaside	345.156	5.68932	93.2555	100 - 17.9 - 3.15 - 0.373
Histamine-betaxanthin	341.067	5.69713	90.6419	100 - 16.9 - 2.17 - 0.206
Dalbergin	313.072	5.69713	91.0449	100 - 17.6 - 2.28 - 0.219
Deoxycholic acid 3-glucuronide	549.308	5.69713	83.6965	100 - 33.4 - 7.45 - 1.25 - 0.172
Zanamivir	313.112	5.69713	93.6814	100 - 14.9 - 2.48 - 0.259
2,3-dinor Prostaglandin E1	325.203	5.69713	81.5995	100 - 20 - 2.92 - 0.318
Methylisopelletierine	200.129	5.70495	91.5938	100 - 10.3 - 0.686
PG(22:6(5Z,8E,10Z,13Z,15E,19Z)-2OH(7S, 17S)/i-16:0)	847.476	5.71277	81.6296	100 - 48.9 - 14.2 - 3.03 - 0.525
Lithocholic acid glucuronide	533.313	5.7206	92.1945	100 - 33.3 - 7.23 - 1.18 - 0.157
Ptaquiloside	443.193	5.72842	90.5965	100 - 22.3 - 4.01 - 0.525
Val-Pro-Asp-Pro-Arg	617.282	5.73625	87.3002	100 - 30.7 - 6.22 - 0.944 - 0.117
Cucurbitacin I	513.287	5.74408	88.7716	100 - 33.2 - 6.77 - 1.03 - 0.127
Cinncassiol A 19-glucoside	543.245	5.74408	87.0143	100 - 29 - 6.53 - 1.08 - 0.151
Triterpenoids	517.318	5.74408	94.9284	100 - 32.1 - 6 - 0.825
Medicagenic acid 3-O-b-D-glucuronide	677.355	5.7519	89.8226	100 - 40 - 10.3 - 1.97 - 0.31
Sucrose monolaurate	545.26	5.7519	86.8571	100 - 26.9 - 5.95 - 0.951 - 0.131
Cucurbitacin D	515.302	5.7519	93.0437	100 - 33.2 - 6.78 - 1.03 - 0.127
7a,12a-Dihydroxy-5a-cholestan-3-one	439.322	5.75973	92.1577	100 - 29.8 - 4.91 - 0.581
24(28)-Dehydromakisterone	537.308	5.75973	89.5422	100 - 31.1 - 6.1 - 0.896 - 0.107
Desglucocoroloside	503.303	5.75973	92.1138	100 - 32.1 - 6.43 - 0.962 - 0.117
Andrographolide	349.202	5.7676	87.0644	100 - 22.2 - 3.37 - 0.384
13,14-dihydro-15-keto-tetranor Prostaglandin D2	297.171	5.77542	84.0783	100 - 17.8 - 2.52 - 0.26
6-Ethylchenodeoxycholic acid	441.301	5.78325	87.8223	100 - 28.8 - 4.81 - 0.591
Piperdial	499.307	5.78325	88.7372	100 - 16.6 - 1.91 - 0.164
Metabolite M6	521.313	5.78325	86.3457	100 - 34.5 - 6.61 - 0.91
Lucidenic acid M	483.276	5.79108	91.9608	100 - 29.9 - 5.55 - 0.768
MJDBISSN00000003	411.306	5.79108	97.5835	100 - 26.6 - 4.41 - 0.549
Porrigenin A	469.297	5.7989	95.3504	100 - 29.9 - 5.34 - 0.706
3-Dehydroteasterone	491.339	5.82308	85.1738	100 - 31 - 5.45 - 0.7
PE(16:1/0:0)	450.263	5.85978	86.1382	100 - 23.8 - 4.15 - 0.539
Dehydrotumulosic acid	529.354	5.91925	87.9693	100 - 34.2 - 6.5 - 0.889
(3beta,5alpha,9alpha,22E,24R)-5,9-Epidioxy-3-hydroxyergosta-7,22-dien-6-one	487.307	5.91925	94.8814	100 - 30.9 - 5.44 - 0.697
Digoxigenin monodigitoxoside	501.287	5.91925	86.6289	100 - 32.2 - 6.65 - 1.03 - 0.13
PE(17:1/0:0)	464.279	5.91925	85.6864	100 - 24.9 - 4.42 - 0.585
Pubesenolide	503.303	5.92707	91.8304	100 - 31 - 5.66 - 0.763
Tuliposide A	313.072	5.92707	92.585	100 - 12.4 - 2.35 - 0.228
Luteolin	331.046	5.92707	95.1225	100 - 16.6 - 2.52 - 0.266
8-(4-sulfophenyl)octanoic Acid	299.096	5.92707	92.0591	100 - 16.4 - 6.8 - 0.931 - 0.138
3-O-Methylkaempferol	281.046	5.92707	85.6071	100 - 17.7 - 2.7 - 0.294
4-coumaroylshikimate	341.067	5.93488	91.3995	100 - 17.8 - 2.92 - 0.332
Piperonyl sulfoxide	323.169	5.9427	83.1035	100 - 20.7 - 7.17 - 1.15 - 0.153
PA(15:0/18:0)	707.488	5.9427	80.4881	100 - 40.1 - 9.46 - 1.65 - 0.231
Aflatoxin GM1	325.036	5.9427	95.4849	100 - 18.8 - 3.32 - 0.402
Isokaempferide	299.056	5.9427	84.5333	100 - 17.7 - 2.7 - 0.294
Ayapin	235.025	5.9661	95.8991	100 - 11 - 1.37 - 0.107
LysoPE(P-18:0/0:0)	464.315	6.02878	80.4259	100 - 26 - 4.48 - 0.58
S-adenosyl-L-methioninamine	355.159	6.05223	92.5151	100 - 18.5 - 6.76 - 1.01 - 0.131
PG(22:6(4Z,7Z,11E,13Z,15E,19Z)-2OH(10S,17)/i-16:0)	847.476	6.16082	86.121	100 - 48.9 - 14.2 - 3.03 - 0.525
Phenylalanylhistidine	337.11	6.271	94.0976	100 - 18 - 2.15 - 0.192
Tamarixetin	299.057	6.28665	92.6056	100 - 17.7 - 2.92 - 0.332
PA(14:1(9Z)/PGJ2)	731.364	6.3023	84.5626	100 - 41.1 - 10.3 - 1.91 - 0.289
Quinaprilat	447.135	6.3023	81.752	100 - 26.1 - 4.3 - 0.529
1-Methylhistidine	337.166	6.31013	92.952	100 - 8.87 - 0.761
Cinnamyl acetate	221.082	6.31797	98.9602	100 - 12.1 - 1.08
Antcin K	487.307	6.31797	92.4211	100 - 32.1 - 6.22 - 0.893 - 0.104
2,3-Dimethoxy-5-methyl-6-(9'-carboxynonyl)-1,4-benzoquinone	749.377	6.31797	88.1885	100 - 21.1 - 3.35 - 0.394
Medicagenate	499.307	6.31797	86.6916	100 - 33.2 - 6.56 - 0.961 - 0.113
19alpha-19-Hydroxy-3,11-dioxo-12-ursen-28-oic acid	515.302	6.31797	92.882	100 - 32 - 5.99 - 0.824
PI(6 keto-PGF1alpha/22:5(7Z,10Z,13Z,16Z,19Z))	1019.51	6.31797	83.1739	100 - 56.8 - 19.3 - 4.86 - 0.995 - 0.174
N-Eicosapentaenoyl Threonine	384.251	6.32578	79.1209	100 - 26.9 - 4.3 - 0.508
Elatoside G	663.376	6.32578	94.5104	100 - 40 - 10 - 1.89 - 0.29
Cis-4-Decenedioic acid	399.203	6.3336	90.661	100 - 11.2 - 1.39 - 0.108
L-erythro-5-(1-Hydroxyethyl)-2(5H)-furanone	315.109	6.3336	94.8994	100 - 6.7 - 0.806
Isoketocamphoric acid	215.092	6.34143	90.8416	100 - 11.2 - 1.6 - 0.132
Diacetone Alcohol	115.076	6.34143	95.1042	100 - 6.7 - 0.601
Hexahydro-4-methylphthalic anhydride	213.077	6.36658	96.19	100 - 9.99 - 1.06
Benzoic Acid	121.029	6.36658	95.136	100 - 7.72 - 0.668
4-Hydroxybenzoic Acid	137.024	6.36658	95.636	100 - 7.75 - 0.876
Phthalic Acid	165.019	6.36658	96.5998	100 - 8.87 - 1.17
1-Carboxycyclohexaneacetic Acid	185.082	6.3769	91.1744	100 - 10 - 1.27
(1R,6R)-6-hydroxy-2-succinylcyclohexa-2,4-diene-1-carboxylate	221.046	6.38597	89.1922	100 - 12.3 - 1.92 - 0.174
3,4-Methylenedioxybenzaldehyde	195.03	6.48575	98.3418	100 - 8.84 - 0.96
P-Anisic Acid	151.04	6.49357	92.1302	100 - 8.86 - 0.962
4-Methylcatechol	123.044	6.50138	92.2435	100 - 7.74 - 0.67
Histidylphenylalanine	337.11	6.5494	88.5421	100 - 18 - 2.15 - 0.192
5-(Biotinamido)pentylamine	365.141	6.5494	90.1303	100 - 18.9 - 6.62 - 0.99 - 0.121
Cortisol 21-mesylate	461.16	6.82087	78.6527	100 - 25.2 - 9.01 - 1.7 - 0.281
(E)-indol-3-ylacetaldoxime	211.028	7.00243	88.8655	100 - 11.7 - 0.83
Thymol Sulfate	211.043	7.04068	84.3578	100 - 11.9 - 5.99 - 0.622
2-Dodecoxyethyl Hydrogen Sulfate	309.175	7.04068	92.1411	100 - 16.5 - 6.82 - 0.939 - 0.139
4-(undecan-5-yl)benzene-1-Sulfonic Acid	311.169	7.04068	97.3227	100 - 19.6 - 6.96 - 1.08 - 0.141
Nisoldipine	425.11	7.04068	94.8637	100 - 22.9 - 3.73 - 0.455
Dodecyl Hydrogen Sulfate	265.148	7.04068	97.1953	100 - 14.2 - 6.28 - 0.762 - 0.107
4-Dodecylbenzenesulfonic acid	325.185	7.04068	97.1929	100 - 20.7 - 7.18 - 1.15 - 0.153
Ajulemic acid	381.247	7.0485	82.4514	100 - 27.6 - 4.49 - 0.538
PA(18:4(6Z,9Z,12Z,15Z)/14:1(9Z))	673.359	7.0563	84.6612	100 - 38.8 - 8.98 - 1.54 - 0.212
Adb-chminaca, (+/-)-	407.188	7.06407	89.3878	100 - 24.6 - 3.31 - 0.319
AB-Chminaca	393.172	7.06407	94.8247	100 - 23.5 - 3.05 - 0.285
Methyl 3,4-dihydroxy-5-prenylbenzoate 3-glucoside	433.128	7.06407	79.5529	100 - 21.2 - 3.98 - 0.527
6-isobutyl-4-hydroxy-2-pyrone	333.136	7.06407	93.405	100 - 9.97 - 1.06
PG(22:6(4Z,7Z,11E,13Z,15E,19Z)-2OH(10S,17)/16:0)	847.476	7.08465	92.52	100 - 48.9 - 14.2 - 3.03 - 0.525
2-Benzothiazolsulfonic Acid	213.964	7.1008	89.0749	100 - 9.71 - 10.1 - 0.876 - 0.338
Phosphoglycolic acid	154.974	7.10862	96.4316	100 - 2.45 - 1.25
Coumarin-4-carboxylic acid	235.025	7.10862	91.6658	100 - 11 - 1.37 - 0.107
Clomipramine	313.149	7.10862	62.2899	100 - 21.5 - 34.2 - 7.03 - 0.712
Chloroxuron	271.065	7.13212	73.1628	100 - 17.2 - 33.8 - 5.64 - 0.584
Kojic Acid	123.008	7.26047	92.8308	100 - 6.71 - 1.01
Gluconic Acid	177.04	7.50965	92.0497	100 - 6.89 - 1.64 - 0.102
2-(Hydroxymethoxy)acetic acid	105.019	7.74637	95.8492	100 - 3.47 - 0.864
8-Prenylnaringenin	321.113	0.9155	83.9431	100 - 22.1 - 3.34 - 0.38
Ethyl glucoside	207.087	2.4626	98.3355	100 - 9.07 - 1.6 - 0.12
3-Benzyl-1-methyl-2,6-dioxo-7H-purine-8-sulfonic acid	381.05	2.5174	85.7235	100 - 16.7 - 6.85 - 0.951 - 0.14
Catechin 7-glucuronide	465.104	2.846	91.6793	100 - 23.4 - 5.09 - 0.763 - 0.102
Noradrenochrome o-semiquinone	212.056	2.8773	94.2482	100 - 9.24 - 0.996
1-[(3R,4R,5R)-3-Fluoro-3,4-dihydroxy-5-(1-hydroxyethyl)oxolan-2-yl]pyrimidine-2,4-dione	311.045	2.8862	96.4117	100 - 11.9 - 1.88 - 0.168
L-Dihydroorotic acid	315.055	3.0665	94.7677	100 - 6.36 - 0.994
Trans-3-Hydroxycotinine glucuronide	349.105	3.3859	95.0278	100 - 18.6 - 3.27 - 0.394
1H-Purine-2,6-dione, 7-(2-(4-(2-chlorophenyl)-1-piperazinyl)ethyl)-3,7-dihydro-1,3-dimethyl-	447.155	3.4529	68.2302	100 - 23.1 - 34.9 - 7.65 - 0.966
Pyridoxal	393.131	3.497	90.5211	100 - 9.24 - 0.996
PG(a-13:0/PGJ2)	793.409	4.4322	91.4728	100 - 43.4 - 11.7 - 2.34 - 0.382
PG(PGJ2/16:0)	837.435	4.5032	89.6862	100 - 46.7 - 13.1 - 2.74 - 0.463
6-Formylumbelliferone	235.025	4.9177	98.2419	100 - 11 - 1.37 - 0.107
(R)-Carvone	195.102	4.9226	97.7123	100 - 11 - 0.754
Gamma-Glutamylglutamic acid	611.202	5.5076	90.654	100 - 12 - 2.1 - 0.194
PIP2(16:0/20:4(5Z,8Z,11Z,14Z))	508.225	5.563	81.5371	100 - 50.3 - 16.3 - 3.96 - 0.791 - 0.136
PIP(16:2(9Z,12Z)/TXB2)	499.219	5.5951	76.4837	100 - 50.3 - 16.5 - 4.06 - 0.824 - 0.144
D-Kynurenine	415.162	5.6734	95.5139	100 - 11.8 - 1.25
1alpha,3beta,22R-Trihydroxyergosta-5,24E-dien-26-oic acid 3-O-b-D-glucoside 26-O-[b-D-glucosyl-(1->2)-b-D-glucosyl] ester	927.461	5.6815	94.6309	100 - 51.4 - 17 - 4.23 - 0.866 - 0.152
PI(16:0/PGJ2)	925.445	5.6971	87.5441	100 - 50.1 - 15.4 - 3.51 - 0.654 - 0.104
Ganoderic acid G	531.297	5.7128	92.5074	100 - 33.3 - 7 - 1.1 - 0.141
(7Z)-3-Hydroxytetradec-7-enedioylcarnitine	396.243	5.7754	83.887	100 - 23.8 - 4.14 - 0.537
3a,6b,7b-Trihydroxy-5b-cholanoic acid	429.265	5.7832	93.8513	100 - 26.6 - 4.43 - 0.551
(22E)-(24R)-1alpha,24-Dihydroxy-26,27-cyclo-22,23-didehydro-20-epivitamin D3/(22E)-(24R)-1alpha,24-dihydroxy-26,27-cyclo-22,23-didehydro-20-epicholecalciferol	457.297	5.8145	79.502	100 - 29.8 - 4.89 - 0.577
(3beta,5alpha,6alpha,7beta,14alpha,22E,24R)-5,6-Epoxyergosta-8,22-diene-3,7,14-triol	489.323	5.8231	90.3444	100 - 30.9 - 5.45 - 0.698
13'-Hydroxy-gamma-tocotrienol	471.312	5.8512	95.5004	100 - 30.9 - 5.22 - 0.632
LysoPA(18:0/0:0)	483.276	5.9192	92.201	100 - 23.5 - 4.07 - 0.525
8-Isoprostaglandin F2a	335.223	5.9192	80.9224	100 - 22.2 - 3.38 - 0.385
Safinamide	337.11	6.0679	83.4622	100 - 19.4 - 2.19 - 0.183
MAB 4	409.167	6.1928	81.6881	100 - 24.3 - 4.07 - 0.51
PI(22:5(7Z,10Z,13Z,16Z,19Z)/6 keto-PGF1alpha)	1019.51	6.318	83.1739	100 - 56.8 - 19.3 - 4.86 - 0.995 - 0.174
2'-Hydroxygenistein	331.046	6.4145	92.133	100 - 16.6 - 2.52 - 0.266
5-O-Ethyl 3-O-methyl (4S)-2,6-dimethyl-4-(3-nitrophenyl)-3,4-dihydropyridine-3,5-dicarboxylate	397.078	7.0328	80.4522	100 - 20.7 - 3.26 - 0.38
5-(1,1-Dioxido-1,2-thiazinan-2-yl)-N-(4-fluorobenzyl)-8-hydroxy-1,6-naphthyridine-7-carboxamide	411.094	7.0407	74.5663	100 - 24.3 - 8.16 - 1.47 - 0.214
PA(20:4(7E,9E,11Z,13E)-3OH(5S,6R,15S)/8:0)	653.302	7.0563	81.0358	100 - 34.6 - 8.05 - 1.41 - 0.203
Cucumerin A	587.13	7.0641	83.5784	100 - 32.1 - 7.24 - 1.22 - 0.172
